# Supplementary material for: Syntheses of mono and bimetallic cyamelurate polymers with reversible chromic behaviour
Source: Royal Society of Chemistry journal article supplement (doi:10.1039/c9dt01278h), 2019-01-01
Supplement: c9dt01278h1.pdf [file c9dt01278h1.pdf]

## Syntheses of Mono and Bimetallic Cyamelurate Polymers with Reversible Chromic Behaviour

Midhun Mohan,<sup>a</sup> Sanil Rajak,<sup>a</sup> Alexandre A. Tremblay,<sup>a</sup> Thierry Maris<sup>b</sup> and Adam Duong<sup>\*,a</sup>

<sup>a</sup> *Département de Chimie, Biochimie et physique and Institut de Recherche sur l'Hydrogène, Université du Québec à Trois-Rivières, Trois-Rivières, Québec, G9A 5H7, Canada*

<sup>b</sup> *Département de Chimie, Université de Montréal, Montréal, Québec, H3C 3J7, Canada*

\*To whom correspondence should be addressed. E-mail : [adam.duong@uqtr.ca](mailto:adam.duong@uqtr.ca)

| Contents                                                                                                                                 | Pages |
|------------------------------------------------------------------------------------------------------------------------------------------|-------|
| 1) <b>Experimental Section</b>                                                                                                           | S3    |
| 2) <b>Figure S1.</b> Thermal atomic displacement ellipsoid plot of MOP-1.                                                                | S4    |
| 3) <b>Figure S2.</b> Crystal structure of MOP-2.                                                                                         | S5    |
| 4) <b>Figure S3.</b> Crystal structure of MOP-3.                                                                                         | S6    |
| 5) <b>Figure S4.</b> Crystal structure of MOP-4.                                                                                         | S7    |
| 6) <b>Table S1.</b> Crystallographic Data of Metal-Organic Polymers (1-4).                                                               | S8    |
| 7) <b>Figure S5.</b> Crystal structure of MMOP-5.                                                                                        | S9    |
| 8) <b>Figure S6.</b> Crystal structure of MMOP-6.                                                                                        | S10   |
| 9) <b>Figure S7.</b> Crystal structure of MMOP-7.                                                                                        | S11   |
| 10) <b>Table S2.</b> Crystallographic Data of Mixed Metal Organic Polymers (5-7).                                                        | S12   |
| 11) <b>Table S3.</b> Hydrogen bond geometry (Å, °) of MOP-1.                                                                             | S13   |
| 12) <b>Table S4.</b> Hydrogen bond geometry (Å, °) of MOP-2.                                                                             | S13   |
| 13) <b>Table S5.</b> Hydrogen bond geometry (Å, °) of MOP-3.                                                                             | S14   |
| 14) <b>Table S6.</b> Hydrogen bond geometry (Å, °) of MOP-4.                                                                             | S14   |
| 15) <b>Table S7.</b> Hydrogen bond geometry (Å, °) of MMOP-5.                                                                            | S15   |
| 16) <b>Table S8.</b> Hydrogen bond geometry (Å, °) of MMOP-6.                                                                            | S15   |
| 17) <b>Table S9.</b> Hydrogen bond geometry (Å, °) of MMOP-7.                                                                            | S16   |
| 18) <b>Figure S8.</b> Characterization of MOP-1, MOP-2, MOP-4, MMOP-5 and MMOP-7 by PXRD and SEM images of the bulk crystalline samples. | S17   |
| 19) <b>Figure S9.</b> FT-IR spectra of MOPs-(1-4) compared to ligand.                                                                    | S18   |
| 20) <b>Table S10.</b> Assignment of FT-IR spectra peaks of MOPs-(1-4).                                                                   | S19   |
| 21) <b>Figure S10.</b> FT-IR spectra of MMOPs-(5-7) compared to ligand.                                                                  | S20   |
| 22) <b>Table S11.</b> Assignment of FT-IR spectra peaks of MMOPs-(5-7).                                                                  | S21   |
| 23) <b>Figure S11.</b> Thermogravimetric analysis curve of cyamelurate.                                                                  | S22   |
| 24) <b>Figure S12.</b> Energy Dispersive X-ray Diffraction elemental mapping analysis of MMOP-(5-7).                                     | S23   |
| 25) <b>Figure S13.</b> Energy Dispersive X-ray Diffraction plot analysis of MOPs-(1-4).                                                  | S24   |
| 26) <b>Figure S14.</b> Energy Dispersive X-ray Diffraction plot analysis of MMOPs-(5-7).                                                 | S25   |
| 27) <b>Figure S15.</b> Energy Dispersive X-ray Diffraction mapping analysis of MMOP-5 metal ratio study.                                 | S26   |

|     |                                                                                                                           |     |
|-----|---------------------------------------------------------------------------------------------------------------------------|-----|
| 28) | <b>Figure S16.</b> Energy Dispersive X-ray Diffraction point analysis of MMOP-5 metal ratio study.                        | S26 |
| 29) | <b>Figure S17.</b> Energy Dispersive X-ray Diffraction plot of mapping analysis of MMOP-5 metal ratio study.              | S27 |
| 30) | <b>Figure S18.</b> Energy Dispersive X-ray Diffraction plot of point analysis of MMOP-5 metal ratio study.                | S28 |
| 31) | <b>Table S12.</b> Summary of Energy Dispersive X-ray Diffraction analysis of MMOP-5 prepared with different metal ratios. | S28 |
| 32) | <b>Figure S19.</b> XPS patterns of MOP-1.                                                                                 | S29 |
| 33) | <b>Figure S20.</b> XPS patterns of MOP-2.                                                                                 | S30 |
| 34) | <b>Figure S21.</b> XPS patterns of MOP-3.                                                                                 | S31 |
| 35) | <b>Figure S22.</b> XPS patterns of MOP-4.                                                                                 | S32 |
| 36) | <b>Figure S23.</b> XPS patterns of MMOP-5.                                                                                | S33 |
| 37) | <b>Figure S24.</b> XPS patterns of MMOP-6.                                                                                | S34 |
| 38) | <b>Figure S25.</b> XPS patterns of MMOP-7.                                                                                | S35 |
| 39) | <b>Table S13.</b> Binding energy values (eV) of XPS elements peaks for MOPs-(1-4) and MMOPs-(5-7).                        | S36 |
| 40) | <b>Figure S26.</b> Chromic behaviour analysis of MOP-1.                                                                   | S37 |
| 41) | <b>Figure S27.</b> Chromic behaviour analysis of MOP-2.                                                                   | S38 |
| 42) | <b>Figure S28.</b> Chromic behaviour analysis of MOP-3.                                                                   | S39 |
| 43) | <b>Figure S29.</b> Chromic behaviour analysis of MOP-4.                                                                   | S40 |
| 44) | <b>Figure S30.</b> Chromic behaviour analysis of MMOP-5.                                                                  | S41 |
| 45) | <b>Figure S31.</b> Chromic behaviour analysis of MMOP-6.                                                                  | S42 |
| 46) | <b>Figure S32.</b> Chromic behaviour analysis of MMOP-7.                                                                  | S43 |

## Experimental Section

**General notes.** Potassium cyamelurate K<sub>3</sub>L was synthesized by known reported methods.

All chemicals and solvents were purchased from commercial sources and were used without further purification.

**General procedure for preparing MOPs-(1-4).** Aqueous solutions of 0.1 mmol of potassium cyamelurate (6 mL) and 0.6 mmol of metal salt (MnSO<sub>4</sub>, Co(NO<sub>3</sub>)<sub>2</sub>·6H<sub>2</sub>O, Ni(NO<sub>3</sub>)<sub>2</sub>·6H<sub>2</sub>O or Zn(NO<sub>3</sub>)<sub>2</sub>·6H<sub>2</sub>O) (6 mL) were mixed together at room temperature. The mixture was stirred for 2 h and then kept at room temperature for 12 h. Crystalline samples of MOPs-(1-4) were collected by filtration.

**MOP-1.** Amber crystal, yield 91 %. IR(ATR) 3546, 3348, 3240, 2970, 2797, 1678, 1637, 1454, 1439, 1401, 1369, 1331, 1316, 1198, 1148, 1124, 978, 963, 832, 798, 760 cm<sup>-1</sup>. Anal. Calcd for Mn<sub>2</sub>(C<sub>6</sub>N<sub>7</sub>O<sub>3</sub>H)<sub>2</sub>·10H<sub>2</sub>O: C, 19.71; H, 2.95; N, 26.28. Found: C, 19.74; H, 3.31, N, 26.85.

**MOP-2.** Pink crystal, yield 82 %. IR(ATR) 3566, 3462, 3190, 2946, 2797, 1681, 1621, 1487, 1439, 1401, 1369, 1331, 1313, 1204, 1148, 1129, 978, 963, 832, 798, 957, 707, 692 cm<sup>-1</sup>. Anal. Calcd for Co<sub>2</sub>(C<sub>6</sub>N<sub>7</sub>O<sub>3</sub>H)<sub>2</sub>·10H<sub>2</sub>O: C, 19.53; H, 2.97; N, 26.03. Found: C, 19.52; H, 3.28; N, 26.56.

**MOP-3.** Cyan crystal, yield 80 %. IR(ATR) 3573, 3472, 3198, 2946, 2797, 1681, 1487, 1436, 1403, 1369, 1331, 1315, 1205, 1169, 1148, 1124, 978, 965, 832, 799, 789, 757, 710, 695 cm<sup>-1</sup>. Anal. Calcd for Ni<sub>2</sub>(C<sub>6</sub>N<sub>7</sub>O<sub>3</sub>H)<sub>2</sub>·10H<sub>2</sub>O: C, 19.22; H, 2.79; N, 25.76. Found: C, 19.12; H, 3.21; N, 26.01.

**MOP-4.** Colourless crystal, yield 80 % based on metal salt. IR(ATR) 3390, 3147, 2958, 2797, 1681, 1597, 1516, 1487, 1455, 1403, 1369, 1329, 1315, 1201, 1194, 1161, 1148, 1124, 978, 965, 849, 832, 799, 762, 716, 692 cm<sup>-1</sup>; Anal. Calcd for Zn<sub>2</sub>(C<sub>6</sub>N<sub>7</sub>O<sub>3</sub>H)<sub>2</sub>·10H<sub>2</sub>O: C, 20.28; H, 2.66; N, 25.26. Found: C, 19.24, H 2.96, N 26.17.

**General procedure for preparing MMOPs-(5-7).** Aqueous solutions of 0.1 mmol of potassium cyamelurate (6 mL) and 0.3 mmol equimolar ratio of the two metals salts (A/B =

Mn(SO<sub>4</sub>)/Co(NO<sub>3</sub>)<sub>2</sub>. 6H<sub>2</sub>O, Mn(SO<sub>4</sub>)/Ni(NO<sub>3</sub>)<sub>2</sub>.6H<sub>2</sub>O, or Ni(NO<sub>3</sub>)<sub>2</sub>.6H<sub>2</sub>O/Zn(NO<sub>3</sub>)<sub>2</sub>.6H<sub>2</sub>O) (6 mL) were mixed together at room temperature. The mixture was stirred for 2 h and then kept at room temperature for 12 h. Crystalline samples of MMOPs-(**5-7**) were collected by filtration.

**MMOP-5.** Pink crystal, yield 89 %. IR(ATR) 3567, 3459, 3216, 2964, 2749, 1699, 1682, 1634, 1488, 1455, 1435, 1404, 1369, 1331, 1315, 1201, 1161, 1148, 1125, 1125, 977, 964, 832, 799, 788, 761, 709, 691 cm<sup>-1</sup>. Anal. Calcd for Mn<sub>0.26</sub>Co<sub>1.74</sub>(C<sub>6</sub>N<sub>7</sub>O<sub>3</sub>H)<sub>2</sub>.10H<sub>2</sub>O: C, 19.83; H, 3.11; N, 26.32. Found: C, 19.68; H, 3.03, N, 26.78.

**MMOP-6.** Cyan crystal, yield 90 %. IR(ATR) 3565, 3462, 3207, 2958, 2793, 1682, 1635, 1489, 1454, 1438, 1403, 1369, 1329, 1316, 1202, 1163, 1148, 1126, 978, 964, 833, 799, 787, 760, 709, 693 cm<sup>-1</sup>. Anal. Calcd for Mn<sub>0.32</sub>Ni<sub>1.68</sub>(C<sub>6</sub>N<sub>7</sub>O<sub>3</sub>H)<sub>2</sub>.10H<sub>2</sub>O: C, 19.64; H, 2.99; N, 26.52. Found: C, 19.69; H, 3.03, N, 26.79.

**MMOP-7.** Cyan crystal, yield 80 %. IR(ATR) 3564, 3463, 3192, 2934, 2790, 1682, 1633, 1489, 1455, 1438, 1402, 1368, 1330, 1315, 1204, 1163, 1148, 1126, 979, 966, 833, 800, 788, 767, 759, 708, 694 cm<sup>-1</sup>. Anal. Calcd for Ni<sub>1.41</sub>Zn<sub>0.59</sub>(C<sub>6</sub>N<sub>7</sub>O<sub>3</sub>H)<sub>2</sub>.10H<sub>2</sub>O: C, 19.43; H, 2.96; N, 26.06. Found: C, 19.41; H, 2.99, N, 26.41.

### Studies of Single-Crystal Structures of Metal-Organic Polymers (**1-4**) and Mixed Metal-Organic Polymers (**5-7**)

The position of hydrogen atoms in the structures of MOPs-(**1-4**) are fully refined and determined using the difference Fourier map. For MOP-**1**, MOP-**2** and MOP-**4**, the first 11 Q peaks with electron density maxima appearing in the map correspond exactly to the position of the 11 hydrogen atoms in the asymmetric unit. For MOP-**3**, due to residual electron density around the Ni atom from absorption the Q peaks of all hydrogen atoms are not all in the first 11. For each difference Fourier map of MOPs-(**1-4**), notice that one of the Q peak is closer to the nitrogen atom of the heptazine confirming the presence of N-H group in the structures.

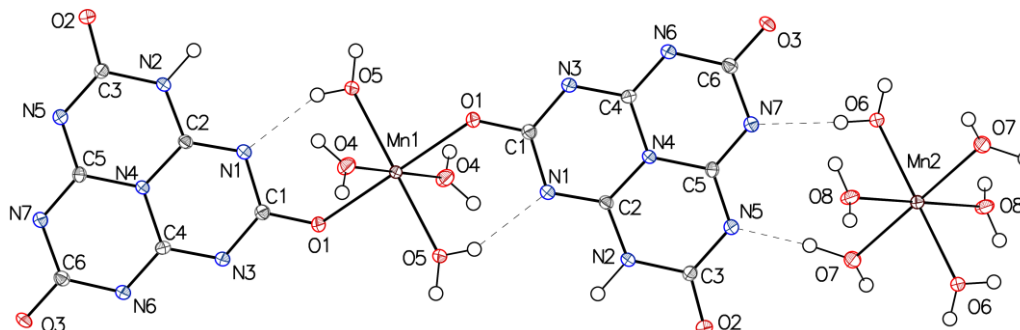

**Figure S1.** Thermal atomic displacement ellipsoid plot of MOP-**1**. The ellipsoids of non-hydrogen atoms are drawn at 50% probability level, hydrogen atoms are represented by a sphere of arbitrary size, and hydrogen bonds are represented by dotted lines.

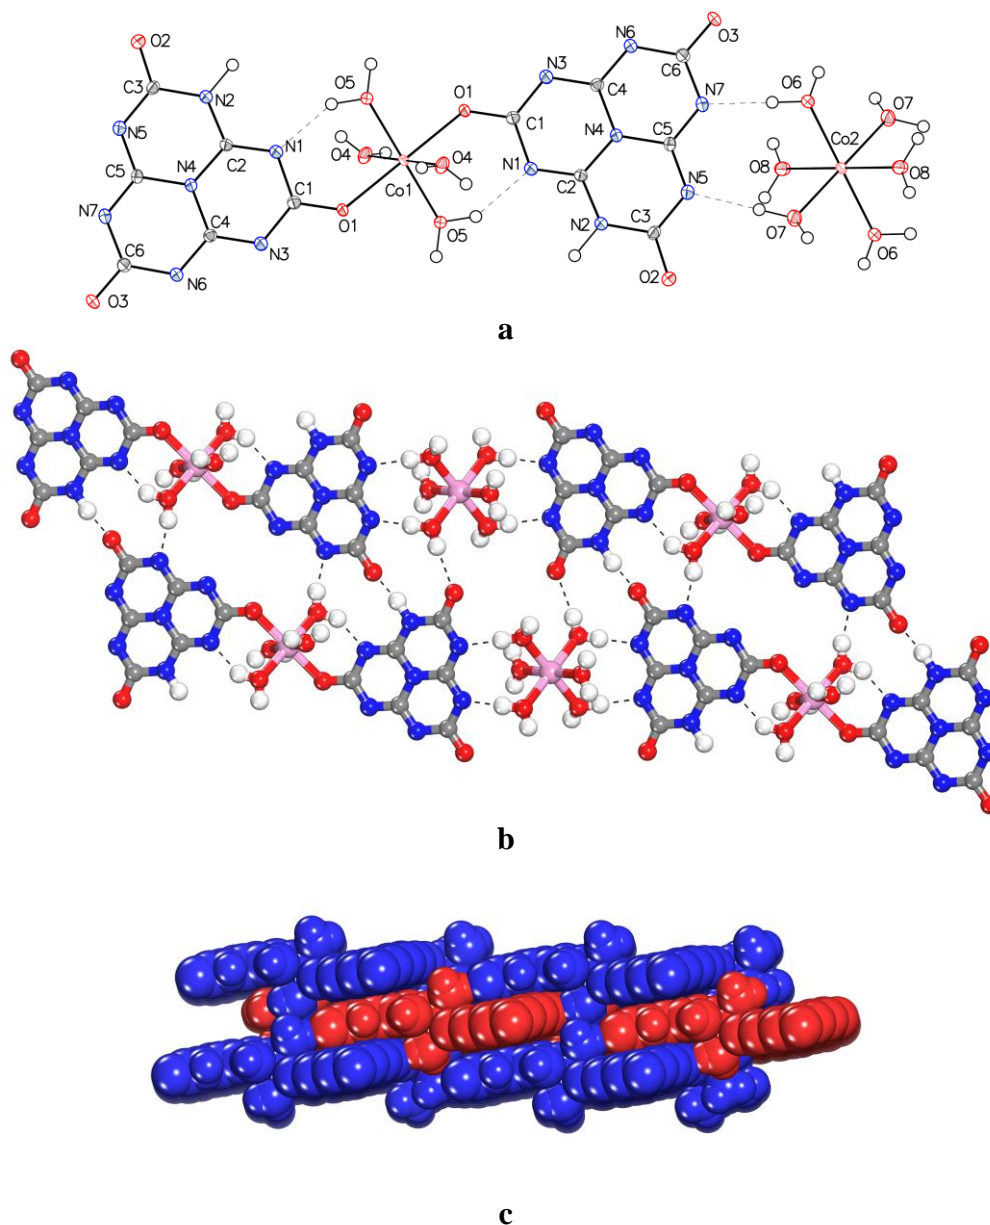

**Figure S2.** Crystal structure of MOP-2. a) Thermal atomic displacement ellipsoid plot of MOP-2. The ellipsoids of non-hydrogen atoms are drawn at 50% probability level, hydrogen atoms are represented by a sphere of arbitrary size, and hydrogen bonds are represented by dotted lines. b) View of the 2D sheets connected by coordination bonds and hydrogen bonds. Hydrogen bonds are represented in dotted lines, and cobalt atoms are shown in pink, carbon atoms in grey, hydrogen atoms in white, nitrogen atoms in blue, and oxygen atoms in red. c) Packing of the 2D sheets to form the three-dimensional structure. For more clarity layers marked in red and blue.

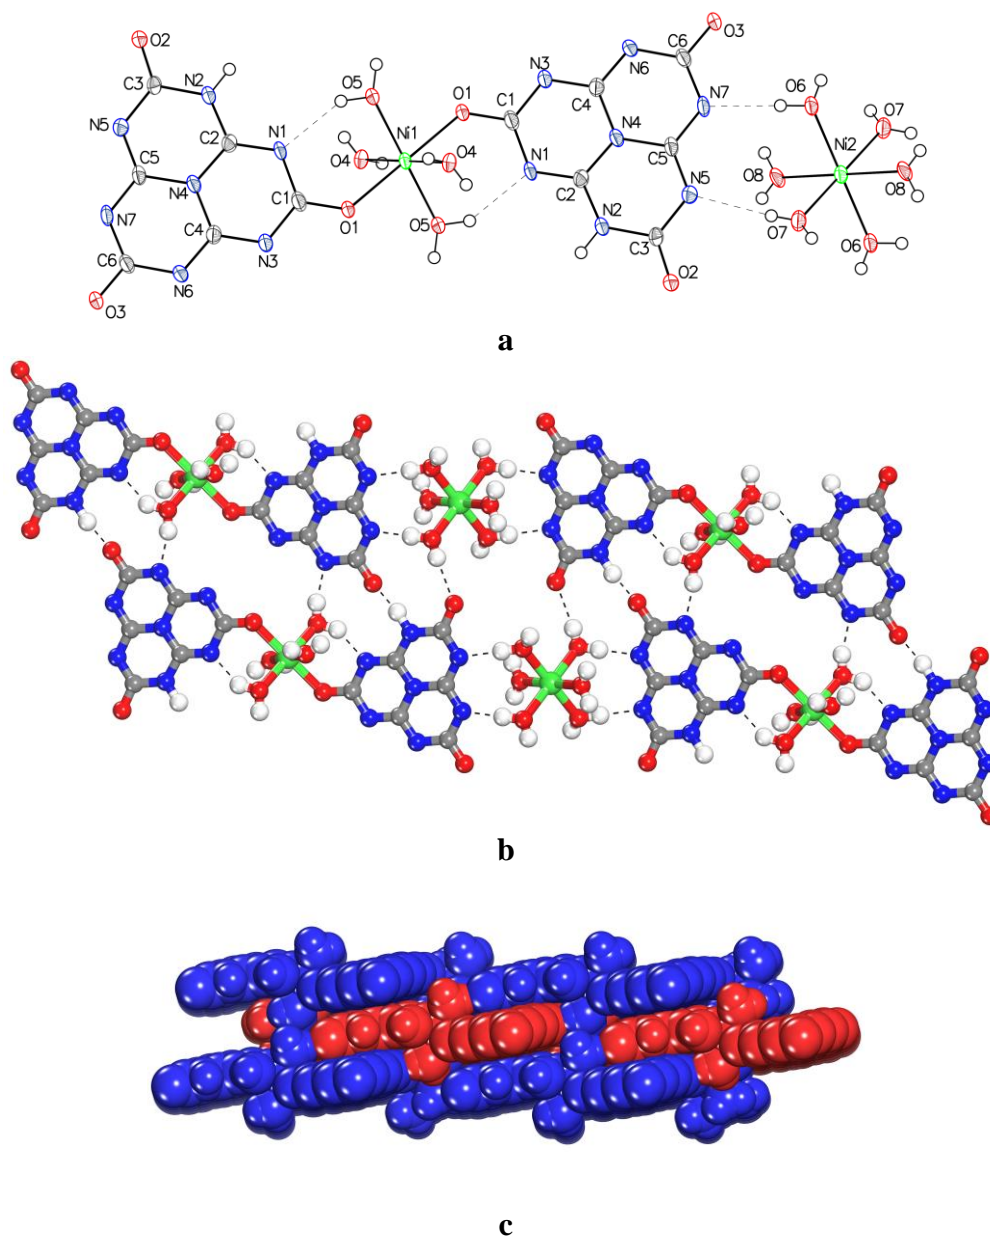

**Figure S3.** Crystal structure of MOP-3. a) Thermal atomic displacement ellipsoid plot of MOP-3. The ellipsoids of non-hydrogen atoms are drawn at 50% probability level, hydrogen atoms are represented by a sphere of arbitrary size, and hydrogen bonds are represented by dotted lines. b) View of the 2D sheets connected by coordination bonds and hydrogen bonds. Hydrogen bonds are represented in dotted lines, and nickel atoms are shown in green, carbon atoms in grey, hydrogen atoms in white, nitrogen atoms in blue, and oxygen atoms in red. c) Packing of the 2D sheets to form the three-dimensional structure. For more clarity layers marked in red and blue.

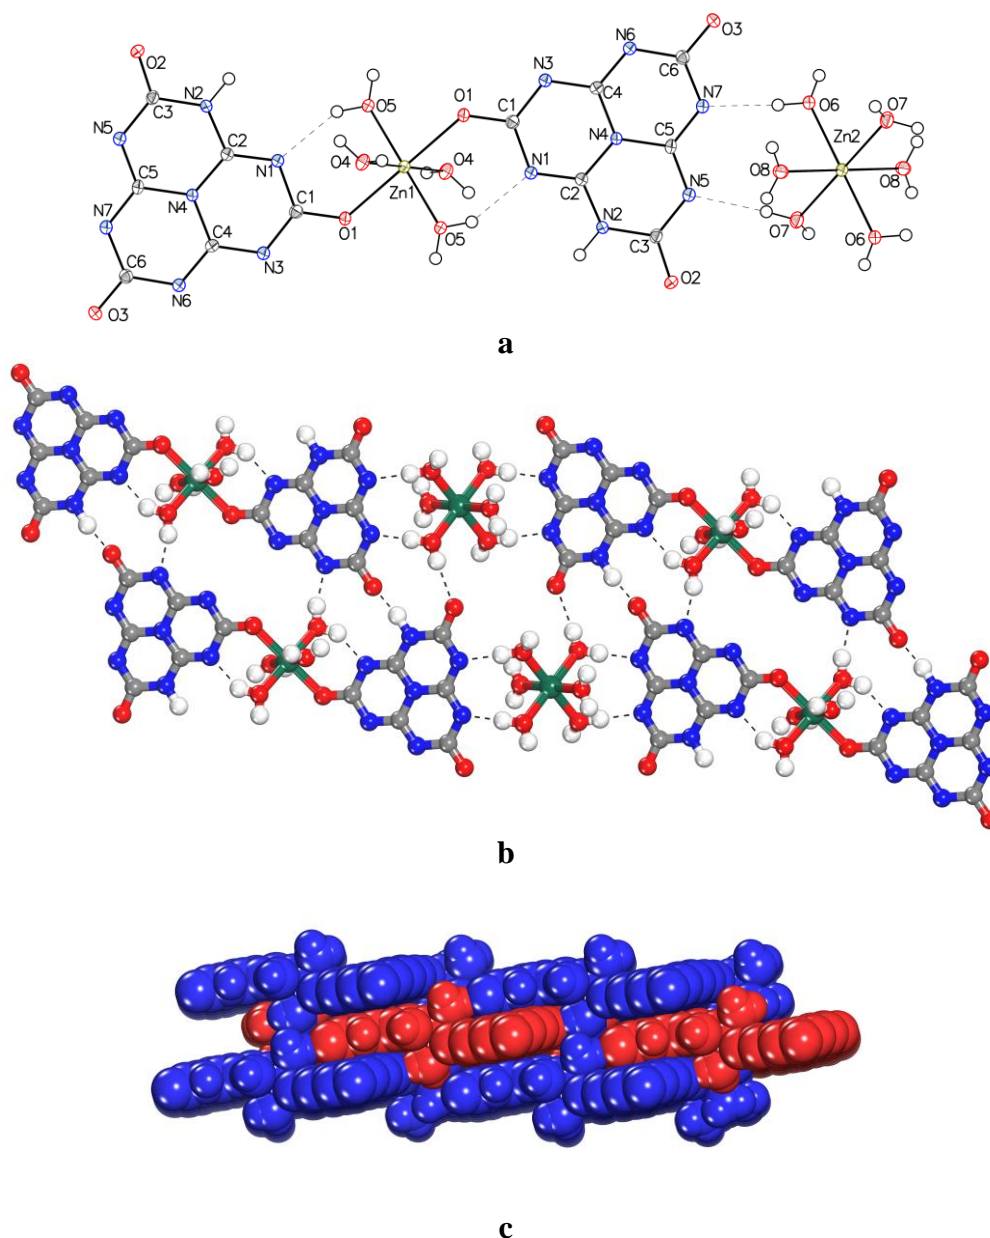

**Figure S4.** Crystal structure of MOP-4. a) Thermal atomic displacement ellipsoid plot of MOP-4. The ellipsoids of non-hydrogen atoms are drawn at 50% probability level, hydrogen atoms are represented by a sphere of arbitrary size, and hydrogen bonds are represented by dotted lines. b) View of the 2D sheets connected by coordination bonds and hydrogen bonds. Hydrogen bonds are represented in dotted lines, and zinc atoms are shown in olive-drab, carbon atoms in grey, hydrogen atoms in white, nitrogen atoms in blue, and oxygen atoms in red. c) Packing of the 2D sheets to form the three-dimensional structure. For more clarity layers marked in red and blue.

**Table S1.** Crystallographic Data of Metal-Organic Polymers (**1-4**).

|                                                | <b>MOP-1</b>                                                                    | <b>MOP-2</b>                                                                    | <b>MOP-3</b>                                                                    | <b>MOP-4</b>                                                                    |
|------------------------------------------------|---------------------------------------------------------------------------------|---------------------------------------------------------------------------------|---------------------------------------------------------------------------------|---------------------------------------------------------------------------------|
| Formula                                        | Mn <sub>2</sub> C <sub>12</sub> H <sub>22</sub> N <sub>14</sub> O <sub>16</sub> | Co <sub>2</sub> C <sub>12</sub> H <sub>22</sub> N <sub>14</sub> O <sub>16</sub> | Ni <sub>2</sub> C <sub>12</sub> H <sub>22</sub> N <sub>14</sub> O <sub>16</sub> | Zn <sub>2</sub> C <sub>12</sub> H <sub>22</sub> N <sub>14</sub> O <sub>16</sub> |
| Crystal System                                 | Triclinic                                                                       | Triclinic                                                                       | Triclinic                                                                       | Triclinic                                                                       |
| Mr                                             | 728.31                                                                          | 736.29                                                                          | 735.82                                                                          | 749.17                                                                          |
| T (K)                                          | 100                                                                             | 120                                                                             | 100                                                                             | 100                                                                             |
| Radiation                                      | GaK $\alpha$                                                                    | GaK $\alpha$                                                                    | GaK $\alpha$                                                                    | GaK $\alpha$                                                                    |
| $\lambda$ (Å)                                  | 1.34139                                                                         | 1.34139                                                                         | 1.34139                                                                         | 1.34139                                                                         |
| F (000)                                        | 370                                                                             | 374                                                                             | 376                                                                             | 380                                                                             |
| Space group                                    | <i>P</i> $\bar{1}$                                                              | <i>P</i> $\bar{1}$                                                              | <i>P</i> $\bar{1}$                                                              | <i>P</i> $\bar{1}$                                                              |
| a (Å)                                          | 6.9844(4)                                                                       | 7.3633(3)                                                                       | 7.3698(3)                                                                       | 7.4188(3)                                                                       |
| b (Å)                                          | 8.7175(5)                                                                       | 8.6464(3)                                                                       | 8.6190(3)                                                                       | 8.6369(4)                                                                       |
| c (Å)                                          | 10.0198(6)                                                                      | 9.2763(3)                                                                       | 9.1796(3)                                                                       | 9.2126(4)                                                                       |
| $\alpha$ (deg)                                 | 79.079(2)                                                                       | 77.947(2)                                                                       | 78.027(2)                                                                       | 77.798(2)                                                                       |
| $\beta$ (deg)                                  | 81.581(2)                                                                       | 84.247(2)                                                                       | 84.389(2)                                                                       | 84.443(2)                                                                       |
| $\gamma$ (deg)                                 | 84.507(2)                                                                       | 87.228(2)                                                                       | 86.957(2)                                                                       | 87.127(2)                                                                       |
| V (Å <sup>3</sup> )                            | 591.11(6)                                                                       | 574.43(4)                                                                       | 567.36(4)                                                                       | 573.99(4)                                                                       |
| Z                                              | 1                                                                               | 1                                                                               | 1                                                                               | 1                                                                               |
| $\rho_{\text{calcd}}$ (g cm <sup>-3</sup> )    | 2.046                                                                           | 2.128                                                                           | 2.154                                                                           | 2.167                                                                           |
| $\mu$ (mm <sup>-1</sup> )                      | 6.655                                                                           | 8.627                                                                           | 9.766                                                                           | 2.388                                                                           |
| No. measured reflections                       | 32337                                                                           | 30851                                                                           | 18351                                                                           | 23186                                                                           |
| No. independent reflections                    | 2698                                                                            | 2633                                                                            | 2490                                                                            | 2636                                                                            |
| No. obsd. reflections I>2 $\sigma$ (I)         | 2632                                                                            | 2457                                                                            | 2599                                                                            | 2454                                                                            |
| Nb Params                                      | 246                                                                             | 246                                                                             | 246                                                                             | 246                                                                             |
| R <sub>1</sub> , I>2 $\sigma$ (%)              | 0.0215                                                                          | 0.0287                                                                          | 0.0742                                                                          | 0.0264                                                                          |
| R <sub>1</sub> , all data (%)                  | 0.0219                                                                          | 0.0307                                                                          | 0.1017                                                                          | 0.0284                                                                          |
| $\omega$ R <sub>2</sub> , I>2 $\sigma$ (I) (%) | 0.0633                                                                          | 0.0764                                                                          | 0.1723                                                                          | 0.0705                                                                          |
| $\omega$ R <sub>2</sub> , all data (%)         | 0.0639                                                                          | 0.0783                                                                          | 0.1909                                                                          | 0.0719                                                                          |
| GoF                                            | 1.116                                                                           | 1.093                                                                           | 1.101                                                                           | 1.067                                                                           |



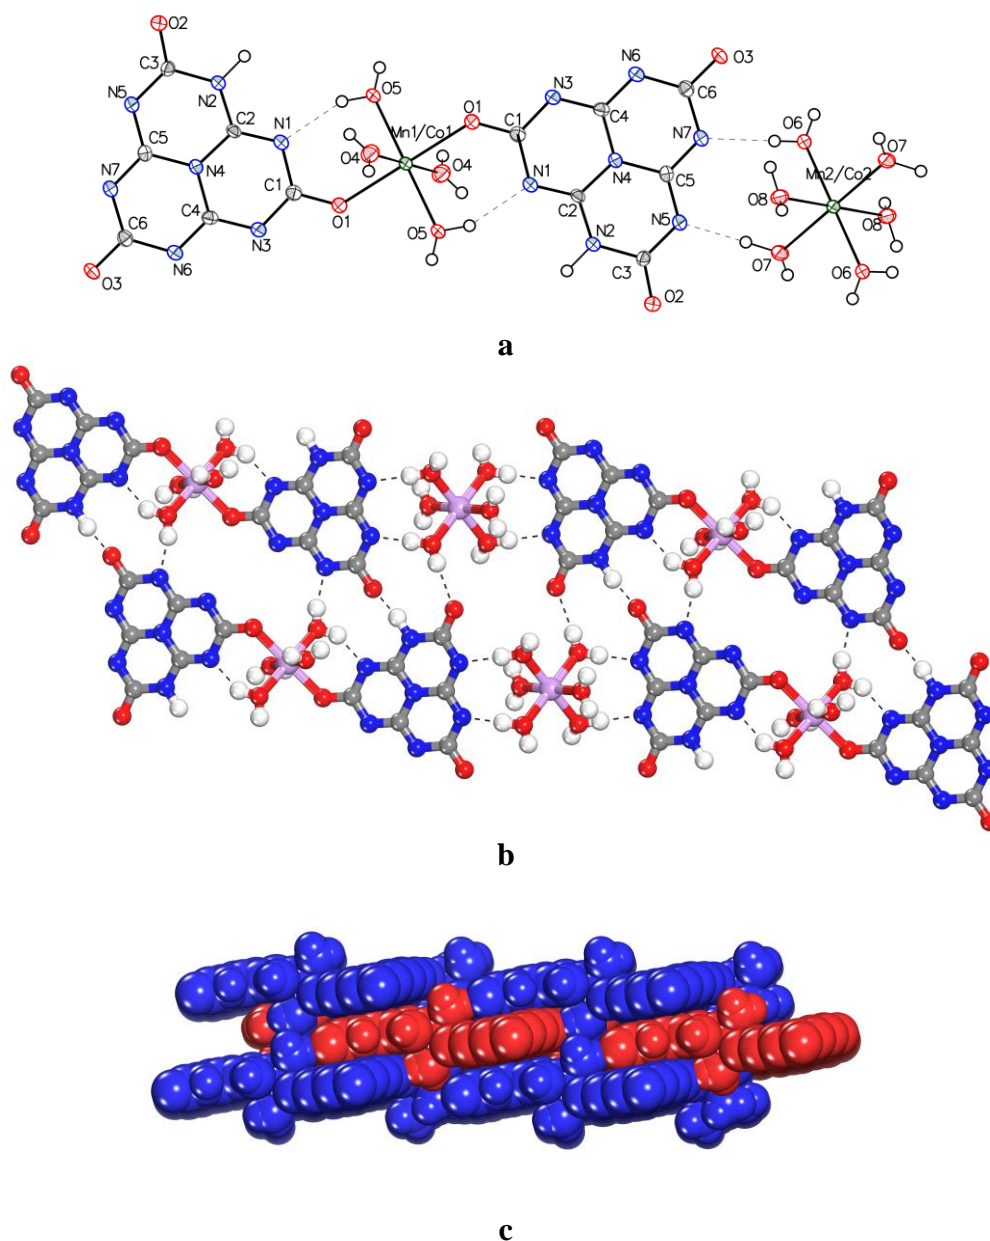

**Figure S5.** Crystal structure of MMOP-5. a) Thermal atomic displacement ellipsoid plot of MMOP-5. The ellipsoids of non-hydrogen atoms are drawn at 50% probability level, hydrogen atoms are represented by a sphere of arbitrary size, and hydrogen bonds are represented by dotted lines. b) View of the 2D sheets connected by coordination bonds and hydrogen bonds. Hydrogen bonds are represented in dotted lines, and manganese and cobalt atoms are shown in dark green, carbon atoms in grey, hydrogen atoms in white, nitrogen atoms in blue, and oxygen atoms in red. c) Packing of the 2D sheets to form the three-dimensional structure. For more clarity layers marked in red and blue.

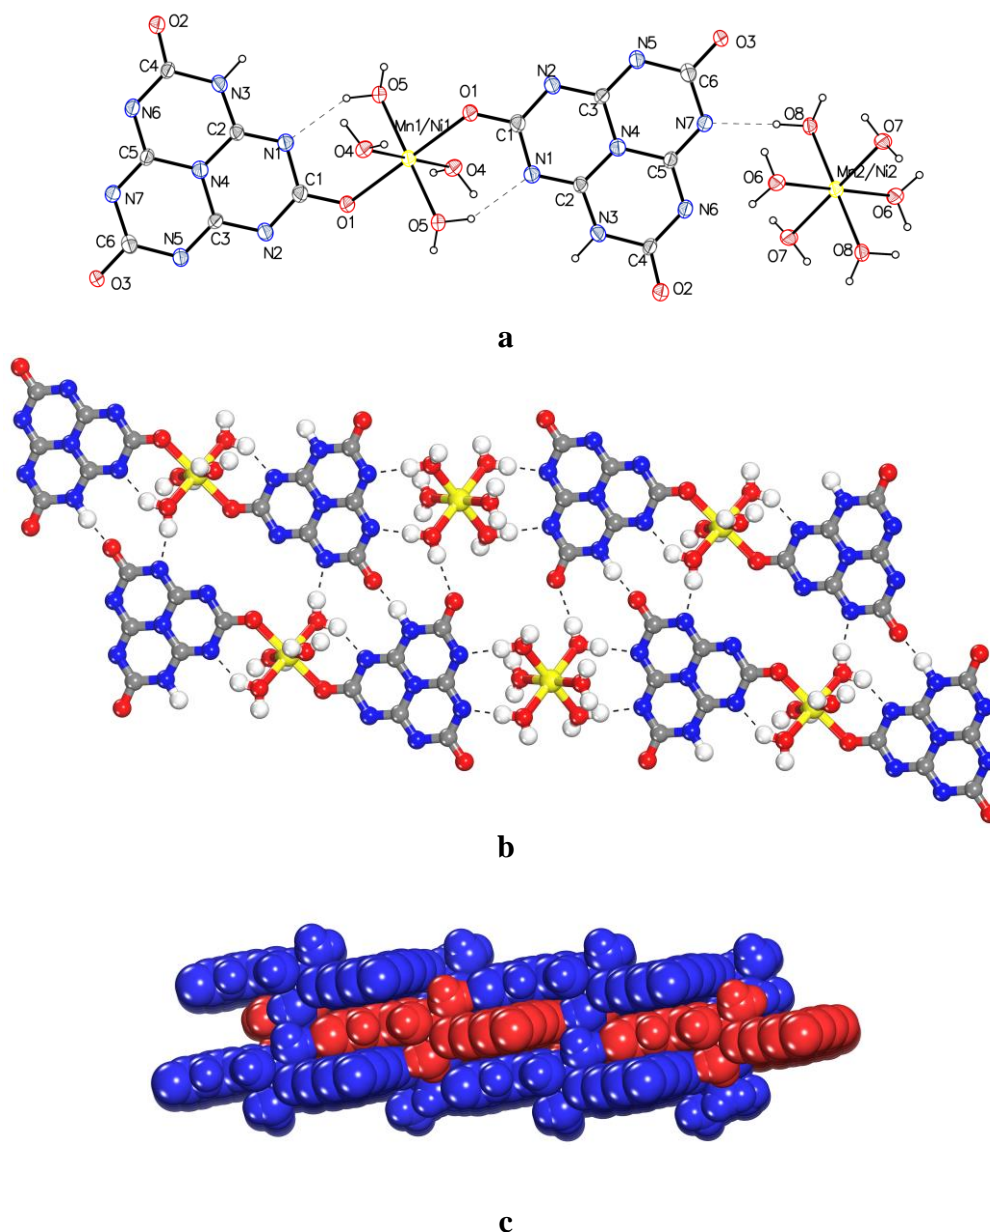

**Figure S6.** Crystal structure of MMOP-6. a) Thermal atomic displacement ellipsoid plot of MMOP-6. The ellipsoids of non-hydrogen atoms are drawn at 50% probability level, hydrogen atoms are represented by a sphere of arbitrary size, and hydrogen bonds are represented by dotted lines. b) View of the 2D sheets connected by coordination bonds and hydrogen bonds. Hydrogen bonds are represented in dotted lines, and manganese and nickel atoms are shown in yellow, carbon atoms in grey, hydrogen atoms in white, nitrogen atoms in blue, and oxygen atoms in red. c) Packing of the 2D sheets to form the three-dimensional structure. For more clarity layers marked in red and blue.

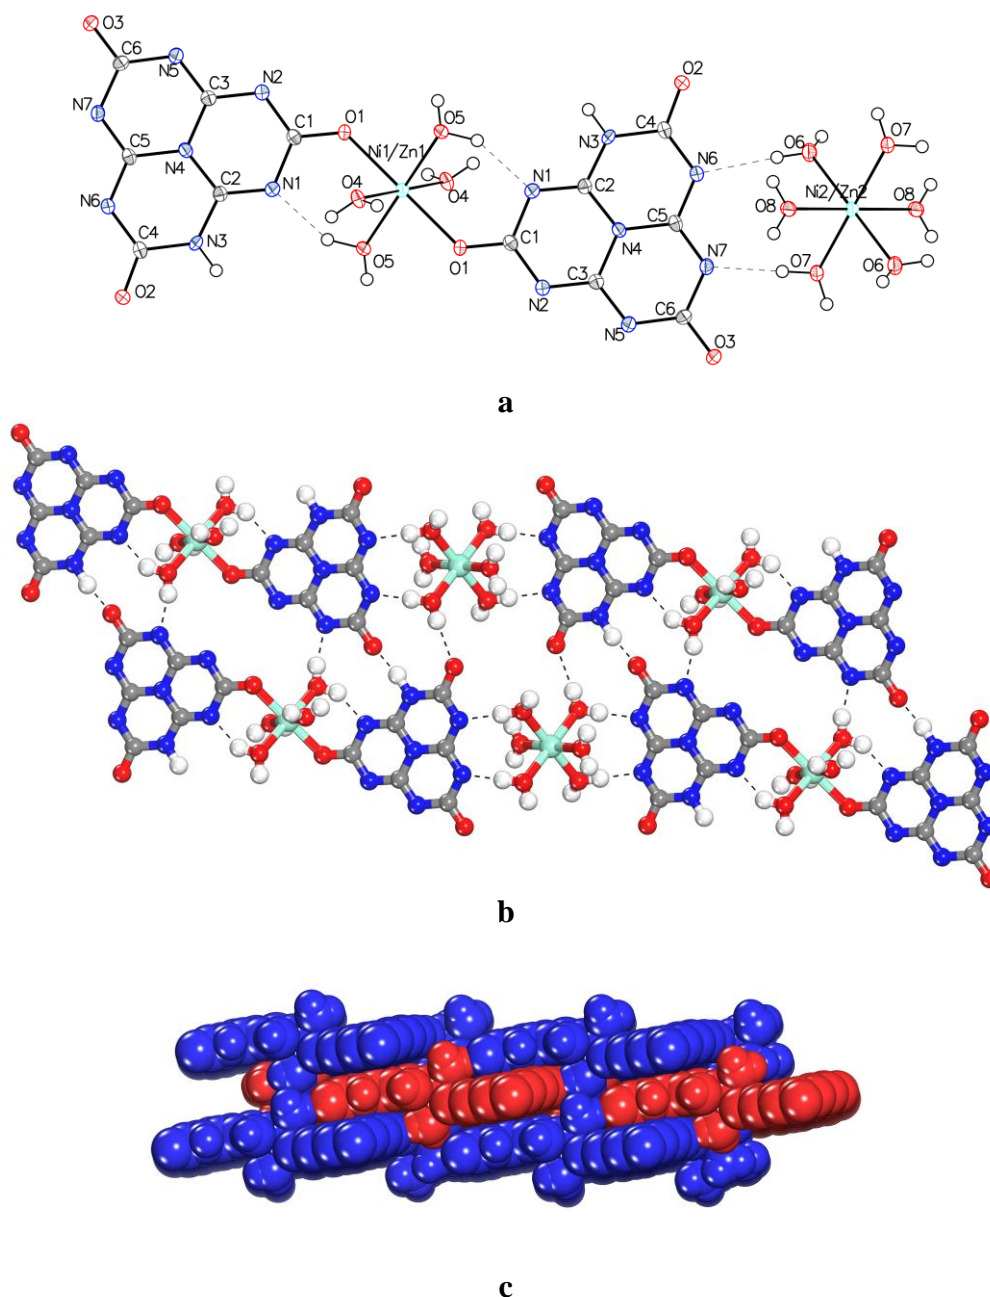

**Figure S7.** Crystal structure of MMOP-7. a) Thermal atomic displacement ellipsoid plot of MMOP-7. The ellipsoids of non-hydrogen atoms are drawn at 50% probability level, hydrogen atoms are represented by a sphere of arbitrary size, and hydrogen bonds are represented by dotted lines. b) View of the 2D sheets connected by coordination bonds and hydrogen bonds. Hydrogen bonds are represented in dotted lines, and nickel and zinc atoms are shown in light blue, carbon atoms in grey, hydrogen atoms in white, nitrogen atoms in blue, and oxygen atoms in red. c) Packing of the 2D sheets to form the three-dimensional structure. For more clarity layers marked in red and blue.

**Table S2.** Crystallographic Data of Mixed Metal-Organic Polymers (5-7).

|                                                | <b>MMOP-5</b>                                                                                       | <b>MMOP-6</b>                                                                                         | <b>MMOP-7</b>                                                                                         |
|------------------------------------------------|-----------------------------------------------------------------------------------------------------|-------------------------------------------------------------------------------------------------------|-------------------------------------------------------------------------------------------------------|
| Formula                                        | Mn <sub>0.3</sub> Co <sub>1.7</sub> C <sub>12</sub> H <sub>22</sub> N <sub>14</sub> O <sub>16</sub> | Mn <sub>0.84</sub> Ni <sub>1.16</sub> C <sub>12</sub> H <sub>22</sub> N <sub>14</sub> O <sub>16</sub> | Ni <sub>1.41</sub> Zn <sub>0.59</sub> C <sub>12</sub> H <sub>22</sub> N <sub>14</sub> O <sub>16</sub> |
| Crystal System                                 | Triclinic                                                                                           | Triclinic                                                                                             | Triclinic                                                                                             |
| Mr                                             | 735.10                                                                                              | 732.69                                                                                                | 739.78                                                                                                |
| T (K)                                          | 120                                                                                                 | 100                                                                                                   | 100                                                                                                   |
| Radiation                                      | GaK $\alpha$                                                                                        | GaK $\alpha$                                                                                          | GaK $\alpha$                                                                                          |
| $\lambda$ (Å)                                  | 1.34139                                                                                             | 1.34139                                                                                               | 1.34139                                                                                               |
| F (000)                                        | 373                                                                                                 | 373                                                                                                   | 377                                                                                                   |
| Space group                                    | <i>P</i> $\bar{1}$                                                                                  | <i>P</i> $\bar{1}$                                                                                    | <i>P</i> $\bar{1}$                                                                                    |
| a (Å)                                          | 6.999(2)                                                                                            | 7.2816(16)                                                                                            | 7.3891(3)                                                                                             |
| b (Å)                                          | 8.6955(2)                                                                                           | 8.6497(19)                                                                                            | 8.6307(3)                                                                                             |
| c (Å)                                          | 9.8777(3)                                                                                           | 9.4431(19)                                                                                            | 9.1887(4)                                                                                             |
| $\alpha$ (deg)                                 | 78.7700(10)                                                                                         | 78.648(13)                                                                                            | 77.928(2)                                                                                             |
| $\beta$ (deg)                                  | 81.6070(10)                                                                                         | 83.519(13)                                                                                            | 84.470(2)                                                                                             |
| $\gamma$ (deg)                                 | 85.0940(10)                                                                                         | 87.455(14)                                                                                            | 87.086(2)                                                                                             |
| V (Å <sup>3</sup> )                            | 582.39(3)                                                                                           | 579.2(2)                                                                                              | 570.08(4)                                                                                             |
| Z                                              | 1                                                                                                   | 1                                                                                                     | 1                                                                                                     |
| $\rho_{\text{calcd}}$ (g cm <sup>-3</sup> )    | 2.096                                                                                               | 2.100                                                                                                 | 2.155                                                                                                 |
| $\mu$ (mm <sup>-1</sup> )                      | 8.245                                                                                               | 8.405                                                                                                 | 7.566                                                                                                 |
| No. measured reflections                       | 27640                                                                                               | 6859                                                                                                  | 16725                                                                                                 |
| No. independent reflections                    | 2658                                                                                                | 2018                                                                                                  | 2583                                                                                                  |
| No. obsd. reflections I>2 $\sigma$ (I)         | 2678                                                                                                | 2208                                                                                                  | 2613                                                                                                  |
| Nb Params                                      | 247                                                                                                 | 209                                                                                                   | 248                                                                                                   |
| R <sub>1</sub> , I>2 $\sigma$ (%)              | 0.0508                                                                                              | 0.1045                                                                                                | 0.0499                                                                                                |
| R <sub>1</sub> , all data (%)                  | 0.0586                                                                                              | 0.1325                                                                                                | 0.0572                                                                                                |
| $\omega$ R <sub>2</sub> , I>2 $\sigma$ (I) (%) | 0.0962                                                                                              | 0.2826                                                                                                | 0.1096                                                                                                |
| $\omega$ R <sub>2</sub> , all data (%)         | 0.0988                                                                                              | 0.3137                                                                                                | 0.1148                                                                                                |
| GoF                                            | 1.217                                                                                               | 1.071                                                                                                 | 1.158                                                                                                 |

**Table S3.** Hydrogen bond geometry (Å, °) of MOP-1.

| <i>D—H···A</i> | <i>D—H</i> | <i>H···A</i> | <i>D···A</i> | <i>D—H···A</i> |
|----------------|------------|--------------|--------------|----------------|
| O4—H4b···O2i   | 0.84 (3)   | 1.86 (3)     | 2.6845 (15)  | 170 (3)        |
| O5—H5a···N6ii  | 0.82 (3)   | 1.97 (3)     | 2.7717 (16)  | 166 (3)        |
| O5—H5b···N1    | 0.79 (3)   | 2.04 (3)     | 2.7709 (16)  | 154 (3)        |
| O6—H6a···O2iii | 0.80 (3)   | 2.12 (3)     | 2.8919 (15)  | 163 (2)        |
| O6—H6b···N7    | 0.79 (3)   | 1.96 (3)     | 2.7554 (16)  | 177 (3)        |
| O7—H7a···N5    | 0.99 (3)   | 1.77 (3)     | 2.7533 (16)  | 170 (2)        |
| O8—H8b···N3iv  | 0.85 (3)   | 1.86 (3)     | 2.7055 (15)  | 176 (2)        |
| N2—H2···O3ii   | 1.00 (2)   | 1.73 (2)     | 2.7243 (14)  | 176.7 (19)     |

Symmetry codes: (i)  $x-1, y, z+1$ ; (ii)  $x, y+1, z$ ; (iii)  $x, y-1, z$ ; (iv)  $x+1, y, z-1$ .

**Table S4.** Hydrogen bond geometry (Å, °) of MOP-2.

| <i>D—H···A</i>             | <i>D—H</i> | <i>H···A</i> | <i>D···A</i> | <i>D—H···A</i> |
|----------------------------|------------|--------------|--------------|----------------|
| O4—H4A···O2 <sup>i</sup>   | 0.79 (3)   | 1.94 (3)     | 2.7180 (18)  | 167 (3)        |
| O4—H4B···O2 <sup>ii</sup>  | 0.92 (4)   | 2.07 (4)     | 2.9800 (19)  | 170 (3)        |
| O5—H5A···O3 <sup>iii</sup> | 0.92 (3)   | 2.51 (3)     | 2.9905 (18)  | 113 (2)        |
| O5—H5A···N1                | 0.92 (3)   | 1.89 (3)     | 2.716 (2)    | 148 (3)        |
| O5—H5B···N6 <sup>iii</sup> | 0.90 (3)   | 1.80 (3)     | 2.682 (2)    | 167 (3)        |
| O6—H6A···O2 <sup>iv</sup>  | 0.82 (3)   | 2.12 (3)     | 2.9220 (19)  | 166 (3)        |
| O6—H6B···N7                | 0.92 (3)   | 1.81 (3)     | 2.730 (2)    | 178 (3)        |
| O7—H7A···N5                | 0.93 (3)   | 1.92 (3)     | 2.835 (2)    | 171 (2)        |
| O7—H7B···O1 <sup>v</sup>   | 0.94 (3)   | 2.00 (4)     | 2.8868 (18)  | 157 (3)        |
| O8—H8A···N3 <sup>v</sup>   | 0.85 (3)   | 1.95 (3)     | 2.785 (2)    | 168 (3)        |
| O8—H8B···O1 <sup>vi</sup>  | 0.90 (4)   | 2.55 (4)     | 3.0698 (18)  | 117 (3)        |
| O8—H8B···O4 <sup>vii</sup> | 0.90 (4)   | 2.19 (4)     | 3.0311 (19)  | 155 (3)        |
| O8—H8B···O5 <sup>vii</sup> | 0.90 (4)   | 2.63 (4)     | 3.3098 (19)  | 133 (3)        |
| N2—H2···O3 <sup>iii</sup>  | 1.07 (3)   | 1.66 (3)     | 2.7200 (18)  | 171 (2)        |

Symmetry codes: (i)  $x+1, y, z-1$ ; (ii)  $-x+I, -y, -z+I$ ; (iii)  $x, y-1, z$ ; (iv)  $x, y+1, z$ ; (v)  $x-1, y, z+1$ ; (vi)  $-x, -y+I, -z+I$ ; (vii)  $x-1, y+1, z+1$ .

**Table S5.** Hydrogen bond geometry (Å, °) of MOP-3.

| <i>D—H···A</i>             | <i>D—H</i> | <i>H···A</i> | <i>D···A</i> | <i>D—H···A</i> |
|----------------------------|------------|--------------|--------------|----------------|
| O4—H4A···O2 <sup>i</sup>   | 0.97 (8)   | 2.00 (8)     | 2.965 (7)    | 177 (7)        |
| O4—H4B···O2 <sup>ii</sup>  | 0.71 (10)  | 2.08 (10)    | 2.719 (6)    | 151 (11)       |
| O5—H5A···N6 <sup>iii</sup> | 0.85 (7)   | 1.85 (8)     | 2.687 (7)    | 166 (6)        |
| O5—H5B···O3 <sup>iii</sup> | 0.81 (8)   | 2.54 (8)     | 2.982 (6)    | 116 (6)        |
| O5—H5B···N1                | 0.81 (8)   | 1.99 (8)     | 2.707 (7)    | 148 (7)        |
| N2—H2···O3 <sup>iii</sup>  | 0.84 (8)   | 1.88 (8)     | 2.714 (7)    | 170 (8)        |
| O6—H6A···O2 <sup>iv</sup>  | 0.75 (9)   | 2.23 (9)     | 2.957 (7)    | 163 (9)        |
| O6—H6B···N7                | 0.80 (9)   | 1.94 (9)     | 2.736 (6)    | 170 (8)        |
| O7—H7A···O1 <sup>v</sup>   | 0.84 (9)   | 2.08 (10)    | 2.895 (6)    | 161 (8)        |
| O7—H7B···N5                | 0.71 (8)   | 2.13 (8)     | 2.837 (7)    | 175 (8)        |

Symmetry codes: (i)  $x, y, z-1$ ; (ii)  $-x+1, -y, -z+1$ ; (iii)  $x, y-1, z$ ; (iv)  $x, y+1, z$ ; (v)  $x-1, y, z+1$ .

**Table S6.** Hydrogen bond geometry (Å, °) of MOP-4.

| <i>D—H···A</i>             | <i>D—H</i> | <i>H···A</i> | <i>D···A</i> | <i>D—H···A</i> |
|----------------------------|------------|--------------|--------------|----------------|
| O4—H4A···O2 <sup>i</sup>   | 0.79 (2)   | 1.97 (2)     | 2.7198 (14)  | 158 (3)        |
| O4—H4B···O2 <sup>ii</sup>  | 0.81 (2)   | 2.17 (2)     | 2.9835 (15)  | 175 (2)        |
| O5—H5A···N6 <sup>iii</sup> | 0.81 (2)   | 1.90 (2)     | 2.6828 (15)  | 164 (3)        |
| O5—H5B···O3 <sup>iii</sup> | 0.81 (2)   | 2.57 (2)     | 2.9903 (14)  | 114 (2)        |
| O5—H5B···N1                | 0.81 (2)   | 1.98 (2)     | 2.7173 (15)  | 151 (2)        |
| N2—H2···O3 <sup>iii</sup>  | 0.91 (2)   | 1.82 (2)     | 2.7176 (14)  | 171 (2)        |
| O6—H6A···O2 <sup>iv</sup>  | 0.78 (1)   | 2.17 (2)     | 2.9303 (14)  | 164 (2)        |
| O6—H6B···N7                | 0.80 (2)   | 1.94 (2)     | 2.7346 (15)  | 176 (2)        |
| O7—H7A···N5                | 0.81 (1)   | 2.04 (1)     | 2.8367 (15)  | 172 (2)        |
| O7—H7B···O1 <sup>v</sup>   | 0.81 (2)   | 2.15 (2)     | 2.8920 (14)  | 153 (3)        |
| O8—H8A···N3 <sup>v</sup>   | 0.78 (1)   | 2.01 (2)     | 2.7839 (15)  | 175 (2)        |
| O8—H8B···O1 <sup>vi</sup>  | 0.79 (2)   | 2.60 (2)     | 3.0714 (15)  | 120 (2)        |
| O8—H8B···O4 <sup>vii</sup> | 0.79 (2)   | 2.28 (2)     | 3.0240 (15)  | 158 (2)        |

Symmetry codes: (i)  $x-1, y, z+1$ ; (ii)  $-x+1, -y+2, -z+1$ ; (iii)  $x, y+1, z$ ; (iv)  $x, y-1, z$ ; (v)  $x+1, y, z-1$ ; (vi)  $-x+2, -y+1, -z+1$ ; (vii)  $x+1, y-1, z-1$ .

**Table S7.** Hydrogen bond geometry (Å, °) of MMOP-5.

| <i>D—H···A</i>             | <i>D—H</i> | <i>H···A</i> | <i>D···A</i> | <i>D—H···A</i> |
|----------------------------|------------|--------------|--------------|----------------|
| O4—H4A···O7 <sup>i</sup>   | 0.75 (6)   | 2.31 (6)     | 3.008 (4)    | 154 (6)        |
| O4—H4B···O2 <sup>ii</sup>  | 0.76 (5)   | 1.93 (5)     | 2.679 (4)    | 174 (5)        |
| O5—H5A···N6 <sup>iii</sup> | 0.78 (5)   | 2.01 (5)     | 2.760 (4)    | 162 (5)        |
| O5—H5B···N1                | 0.85 (5)   | 1.95 (5)     | 2.750 (4)    | 157 (4)        |
| N2—H2···O3 <sup>iii</sup>  | 0.99 (3)   | 1.72 (4)     | 2.716 (3)    | 178 (3)        |
| O6—H6A···O2 <sup>iv</sup>  | 0.78 (5)   | 2.13 (5)     | 2.892 (3)    | 165 (4)        |
| O6—H6B···N7                | 0.80 (5)   | 1.95 (5)     | 2.746 (4)    | 177 (5)        |
| O7—H7A···N5                | 0.96 (5)   | 1.84 (5)     | 2.784 (4)    | 170 (4)        |
| O7—H7B···O1 <sup>v</sup>   | 0.78 (5)   | 2.24 (5)     | 2.991 (3)    | 163 (4)        |
| O8—H8A···O1 <sup>vi</sup>  | 0.75 (5)   | 2.21 (5)     | 2.940 (4)    | 165 (5)        |
| O8—H8B···N3 <sup>vii</sup> | 0.86 (5)   | 1.85 (5)     | 2.715 (4)    | 176 (4)        |

Symmetry codes: (i)  $-x+1, -y+2, -z+1$ ; (ii)  $x-1, y, z+1$ ; (iii)  $x, y+1, z$ ; (iv)  $x, y-1, z$ ; (v)  $x+1, y, z-1$ ; (vi)  $x, y, z-1$ ; (vii)  $-x+1, -y+1, -z+1$ .

**Table S8.** Hydrogen bond geometry (Å, °) of MMOP-6.

| <i>D—H···A</i>              | <i>D—H</i> | <i>H···A</i> | <i>D···A</i> | <i>D—H···A</i> |
|-----------------------------|------------|--------------|--------------|----------------|
| N3—H3···O3 <sup>i</sup>     | 0.88       | 1.85         | 2.725 (10)   | 171            |
| O4—H4A···O2 <sup>ii</sup>   | 0.87       | 1.91         | 2.695 (11)   | 150            |
| O4—H4B···O2 <sup>iii</sup>  | 0.87       | 2.25         | 3.106 (12)   | 169            |
| O5—H5A···N5 <sup>iv</sup>   | 0.87       | 2.05         | 2.709 (11)   | 132            |
| O5—H5B···N1 <sup>v</sup>    | 0.87       | 1.97         | 2.740 (11)   | 147            |
| O5—H5B···O3 <sup>iv</sup>   | 0.87       | 2.62         | 3.077 (9)    | 114            |
| O6—H6A···O4 <sup>iii</sup>  | 0.86       | 2.33         | 3.037 (11)   | 140            |
| O6—H6B···N2 <sup>vi</sup>   | 0.86       | 1.99         | 2.766 (12)   | 150            |
| O7—H7A···N5 <sup>vii</sup>  | 0.87       | 2.66         | 3.458 (12)   | 152            |
| O7—H7B···O1 <sup>vi</sup>   | 0.87       | 2.06         | 2.932 (11)   | 177            |
| O8—H8A···O2 <sup>viii</sup> | 0.88       | 2.12         | 2.923 (10)   | 153            |
| O8—H8B···N7                 | 0.87       | 1.87         | 2.741 (11)   | 177            |

Symmetry codes: (i)  $x, y+1, z$ ; (ii)  $x-1, y, z+1$ ; (iii)  $-x+1, -y+2, -z+1$ ; (iv)  $-x+1, -y+1, -z+2$ ; (v)  $-x+1, -y+2, -z+2$ ; (vi)  $-x+1, -y+1, -z+1$ ; (vii)  $x, y, z-1$ ; (viii)  $x, y-1, z$ .

**Table S9.** Hydrogen bond geometry (Å, °) of MMOP-7.

| <i>D—H...A</i>              | <i>D—H</i> | <i>H...A</i> | <i>D...A</i> | <i>D—H...A</i> |
|-----------------------------|------------|--------------|--------------|----------------|
| N3—H3...O3 <sup>i</sup>     | 0.84 (5)   | 1.88 (5)     | 2.715 (4)    | 171 (4)        |
| O4—H4A...O2 <sup>ii</sup>   | 0.80 (6)   | 1.93 (6)     | 2.717 (4)    | 168 (5)        |
| O4—H4B...O2 <sup>iii</sup>  | 0.88 (6)   | 2.11 (6)     | 2.977 (4)    | 168 (5)        |
| O5—H5A...N1 <sup>iv</sup>   | 0.92 (6)   | 1.89 (6)     | 2.706 (4)    | 148 (5)        |
| O5—H5B...O3 <sup>v</sup>    | 0.77 (7)   | 2.65 (6)     | 2.989 (3)    | 108 (5)        |
| O5—H5B...N5 <sup>v</sup>    | 0.77 (7)   | 1.94 (7)     | 2.689 (4)    | 164 (6)        |
| O6—H6A...N6                 | 0.82 (5)   | 2.03 (5)     | 2.831 (4)    | 165 (4)        |
| O6—H6B...O1 <sup>vi</sup>   | 0.82 (5)   | 2.16 (6)     | 2.900 (4)    | 150 (5)        |
| O7—H7A...N7                 | 0.85 (5)   | 1.88 (6)     | 2.731 (4)    | 177 (5)        |
| O7—H7B...O2 <sup>vii</sup>  | 0.82 (6)   | 2.14 (6)     | 2.943 (4)    | 169 (5)        |
| O8—H8A...N2 <sup>vi</sup>   | 0.81 (5)   | 1.99 (6)     | 2.790 (4)    | 169 (5)        |
| O8—H8B...O1 <sup>viii</sup> | 0.81 (5)   | 2.58 (5)     | 3.067 (3)    | 120 (4)        |
| O8—H8B...O4 <sup>viii</sup> | 0.81 (5)   | 2.27 (6)     | 3.030 (4)    | 156 (5)        |
| O8—H8B...O5 <sup>viii</sup> | 0.81 (5)   | 2.68 (5)     | 3.293 (4)    | 134 (4)        |

Symmetry codes: (i)  $x, y-1, z$ ; (ii)  $-x+1, -y, -z+1$ ; (iii)  $x, y, z-1$ ; (iv)  $-x+2, -y, -z$ ; (v)  $-x+2, -y+1, -z$ ; (vi)  $x-1, y, z+1$ ; (vii)  $x, y+1, z$ ; (viii)  $-x+1, -y+1, -z+1$ .



## Studies of Crystallinity, Purity and Homogeneity of the Bulk Samples of Metal-Organic Polymers (1-4) and Mixed Metal-Organic Polymers (5-7)

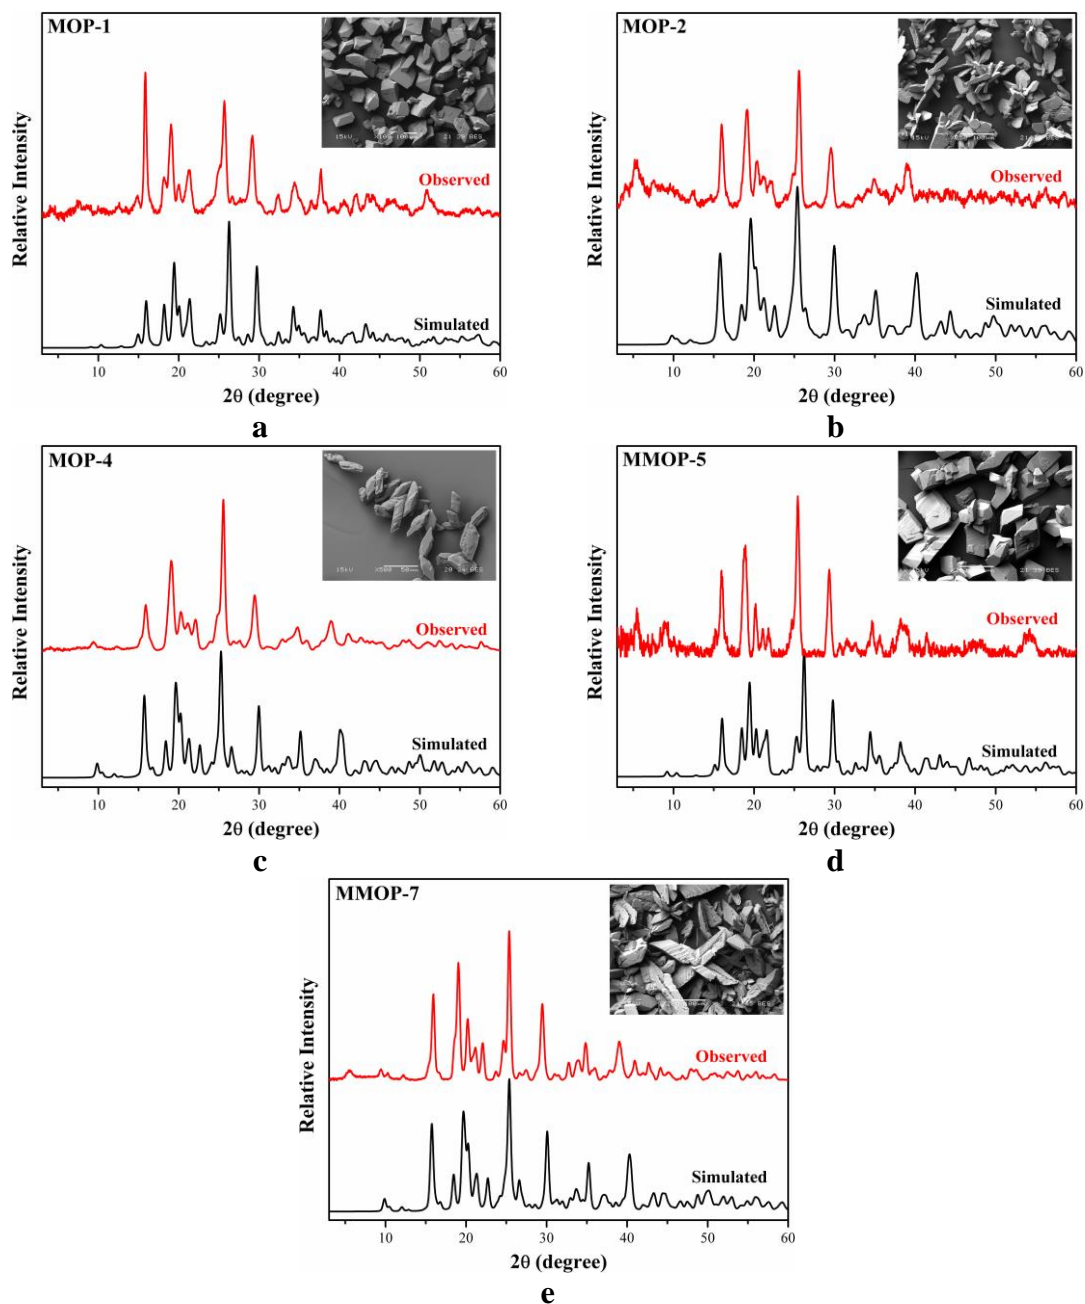

**Figure S8.** Characterization of MOP-1, MOP-2, MOP-4, MMOP-5 and MMOP-7 by PXR and SEM images of the bulk crystalline samples. Scale bar 100  $\mu\text{m}$  for Figure 2a-b and 2d-e, and 50  $\mu\text{m}$  for Figure 2b. (a)-(e) Comparison of the observed powder X-ray diffraction with the simulated pattern calculated from the single-crystal X-ray diffraction data and the insert SEM images for each sample. Observed PXR and simulated patterns are shown in red and black respectively.

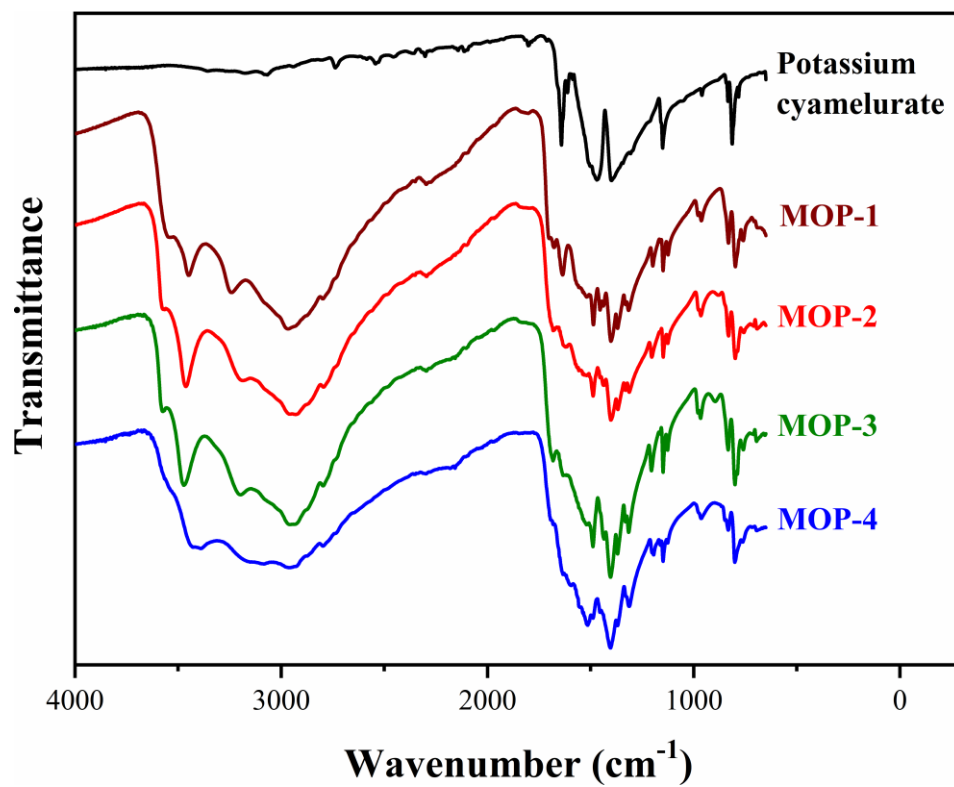

**Figure S9.** FT-IR spectra of MOPs-(1-4) compared to ligand.

**Table S10.** Assignment of FT-IR spectra peaks of MOPs-(1-4).

| Potassium<br>cyamelurate | $\tilde{\nu}/\text{cm}^{-1}$ |                          |                          |                         | Assignment                                                                                                                            |
|--------------------------|------------------------------|--------------------------|--------------------------|-------------------------|---------------------------------------------------------------------------------------------------------------------------------------|
|                          | MOP-1                        | MOP-2                    | MOP-3                    | MOP-4                   |                                                                                                                                       |
|                          | 693sh<br>709sh               | 692sh<br>709sh           | 695sh<br>708sh           | 694sh                   | Ring breathing, $\tau(\text{OH})$                                                                                                     |
|                          | 760w                         | 755sh                    | 760sh                    | 762sh                   | $\tau(\text{OH})$                                                                                                                     |
| 782w<br>814m             | 777w<br>798w                 | 787w<br>799w             | 768w<br>788w<br>800w     | 801w                    | $\gamma(\text{CN})$ -Linker, Ring Breathing for all, $\tau(\text{NH})$ , $\omega(\text{OH})$ -MOPs                                    |
| 834w                     | 832w                         | 831w                     | 833w                     | 833w<br>848sh           | Ring Breathing for all, $\nu(\text{CN})$ saturated N atom-linker, $\omega(\text{OH})$ -MOPs                                           |
| 961w                     | 963w                         | 966w                     | 967w                     | 964w                    | (Ring Breathing, $\nu(\text{CN})$ in ring-linker), $\rho(\text{OH})$ hydrogen-bonded, $\gamma(\text{CN})$ , $\omega(\text{NH})$ -MOPs |
|                          | 1121w<br>1149w<br>1162w      | 1126w<br>1148w           | 1127w<br>1149w<br>1165w  | 1127w<br>1149w<br>1161w | $\nu(\text{CN})$ in ring for all, $\rho(\text{OH})$ -MOPs                                                                             |
| 1150m                    | 1199w                        | 1204w                    | 1205w                    | 1195w<br>1203w          | Ring Breathing, $\rho(\text{OH})$                                                                                                     |
| 1310sh                   | 1317w<br>1333w               | 1313w<br>1333w           | 1316w<br>1331w           | 1313w<br>1330w          | $\nu(\text{CN})$ in ring for all, $\rho(\text{NH})$ -MOPs                                                                             |
|                          | 1370m                        | 1368m                    | 1369m                    | 1369w                   | Ring breathing, $\delta(\text{OH})$                                                                                                   |
| 1399s                    | 1402s<br>1438w               | 1402s<br>1436vw          | 1404s<br>1436w           | 1404s                   | $\nu(\text{CN})$ -linker, $\delta(\text{OH})$ -MOPs                                                                                   |
| 1470s                    | 1455w<br>1487m               | 1488m                    | 1489                     | 1454w<br>1486w          | $\delta(\text{OH})$ -MOPs, $\nu(\text{CN})$ -Linker                                                                                   |
| 1503s                    |                              |                          |                          |                         | $\nu(\text{CN})$ in ring-linker                                                                                                       |
| 1586vw                   |                              |                          |                          |                         | $\nu(\text{CN})$ in ring for all, $\rho(\text{NH})$                                                                                   |
|                          | 1636w                        |                          | 1635sh                   | 1634sh                  | $\omega(\text{NH})$ , Ring Breathing                                                                                                  |
| 1642m                    |                              |                          |                          | 1635sh                  | $\nu(\text{CO})$ single bond type-linker                                                                                              |
|                          | 1677sh<br>1701sh             | 1680sh                   | 1683sh                   |                         | $\nu(\text{CO})$ double bond type-MOPs                                                                                                |
| 1801w                    |                              |                          |                          |                         | $\nu(\text{CO})$ double bond type-linker (due to resonance)                                                                           |
|                          | 2798sh<br>2965s              | 2790sh<br>2930s          | 2796sh<br>2957s          | 2797sh<br>2957m         | $\nu(\text{OH})$ (hydrogen-bonded)                                                                                                    |
|                          | 3240w<br>3450w<br>3547w      | 3193m<br>3463m<br>3579sh | 3201w<br>3473w<br>3576sh | 3085w<br>3390w<br>3430m | $\nu(\text{NH})$ (characteristic amide)                                                                                               |

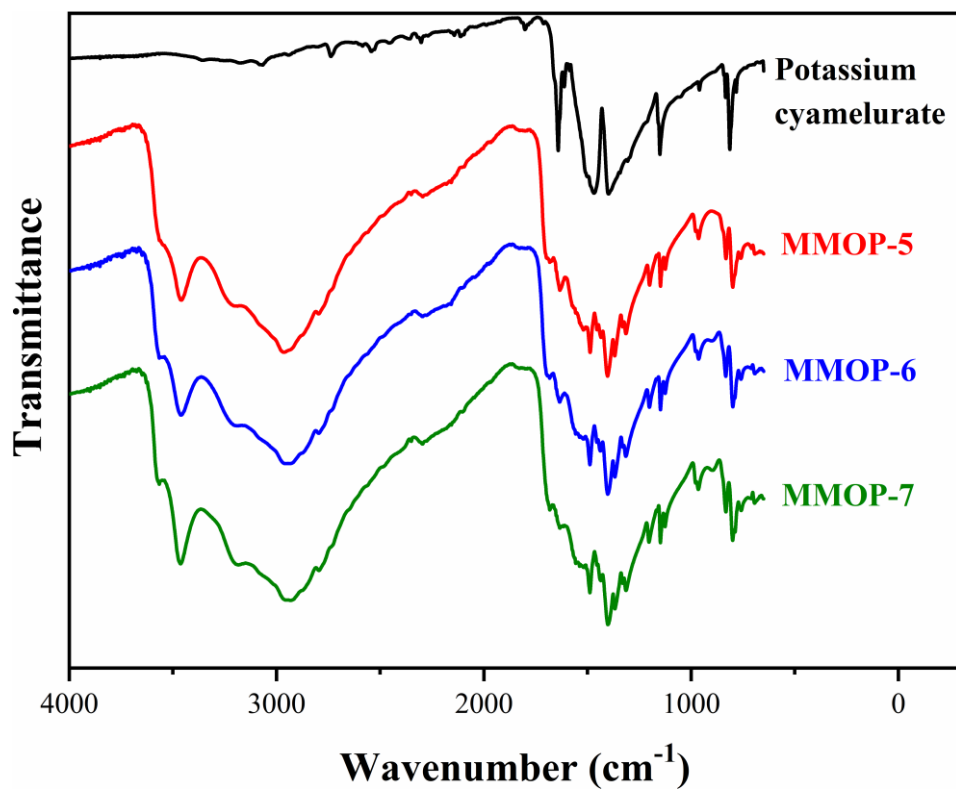

**Figure S10.** FT-IR spectra of MMOPs-(5-7) compared to ligand.

**Table S11.** Assignment of FT-IR spectra peaks of MMOPs-(5-7).

| Potassium<br>cyamelurate | $\tilde{\nu}/\text{cm}^{-1}$ |                          |                          | Assignment                                                                                                                                       |
|--------------------------|------------------------------|--------------------------|--------------------------|--------------------------------------------------------------------------------------------------------------------------------------------------|
|                          | MMOP-5                       | MMOP-6                   | MMOP-7                   |                                                                                                                                                  |
|                          | 691sh<br>709sh               | 693sh<br>709sh           | 694sh<br>708sh           | Ring breathing, $\tau(\text{OH})$                                                                                                                |
|                          | 761sh                        | 760sh                    | 759sh                    | $\tau(\text{OH})$                                                                                                                                |
| 782w<br>814m             | 788sh<br>799w                | 787sh<br>799sh           | 767sh<br>788w<br>800w    | $\gamma(\text{CN})$ -Linker, Ring Breathing for all,<br>$\tau(\text{NH})$ , $\omega(\text{OH})$ -MMOPs                                           |
| 834w                     | 832w                         | 833w                     | 833w                     | Ring Breathing for all, $\nu(\text{CN})$ saturated<br>N atom-linker, $\omega(\text{OH})$ -MMOPs                                                  |
| 961w                     | 964w                         | 964w                     | 966w                     | (Ring Breathing, $\nu(\text{CN})$ in ring-linker),<br>( $\rho(\text{OH})$ hydrogen-bonded, $\gamma(\text{CN})$ ),<br>$\omega(\text{NH})$ -MMOPs) |
| 1051sh                   | 977w                         | 978w                     | 979w                     |                                                                                                                                                  |
|                          | 1125w<br>1148w               | 1126w<br>1148w           | 1126w<br>1148w           | $\nu(\text{CN})$ in ring for all, $\rho(\text{OH})$ -MOPs                                                                                        |
| 1150m                    | 1161sh                       | 1163sh                   | 1163sh                   |                                                                                                                                                  |
|                          | 1201w<br>1315w<br>1331w      | 1202w<br>1316w<br>1329w  | 1204w<br>1315w<br>1330w  | Ring Breathing, $\rho(\text{OH})$                                                                                                                |
| 1310sh                   |                              |                          |                          |                                                                                                                                                  |
|                          | 1369w                        | 1369m                    | 1368m                    | $\nu(\text{CN})$ in ring for all, $\rho(\text{NH})$ -MOPs                                                                                        |
| 1399s                    | 1404s<br>1435w               | 1403s<br>1438w           | 1402s<br>1438w           | Ring breathing, $\delta(\text{OH})$                                                                                                              |
| 1470s                    | 1455w<br>1488w               | 1454w<br>1489w           | 1455w<br>1489w           | $\nu(\text{CN})$ -linker, $\delta(\text{OH})$ -MOPs                                                                                              |
| 1503s                    |                              |                          |                          | $\delta(\text{OH})$ -MOPs, $\nu(\text{CN})$ -Linker                                                                                              |
| 1586vw                   |                              |                          |                          | $\nu(\text{CN})$ in ring-linker<br>$\nu(\text{CN})$ in ring for all, $\rho(\text{NH})$                                                           |
| 1613w                    |                              |                          |                          |                                                                                                                                                  |
|                          | 1634w                        | 1635w                    | 1633w                    |                                                                                                                                                  |
| 1642m                    |                              |                          |                          | $\omega(\text{NH})$ , Ring Breathing                                                                                                             |
|                          | 1682w<br>1699sh              | 1682w                    | 1682w                    | $\nu(\text{CO})$ single bond type-linker                                                                                                         |
| 1801w                    |                              |                          |                          | $\nu(\text{CO})$ double bond type-MOPs                                                                                                           |
|                          | 2794sh<br>2964m              | 2793sh<br>2958s          | 2790sh<br>2934s          | $\nu(\text{CO})$ double bond type-linker (due to<br>resonance)<br>$\nu(\text{OH})$ (hydrogen-bonded)                                             |
|                          | 3216m<br>3459m<br>3567sh     | 3207m<br>3462m<br>3565sh | 3192m<br>3463m<br>3564sh | $\nu(\text{NH})$ (characteristic amide)                                                                                                          |

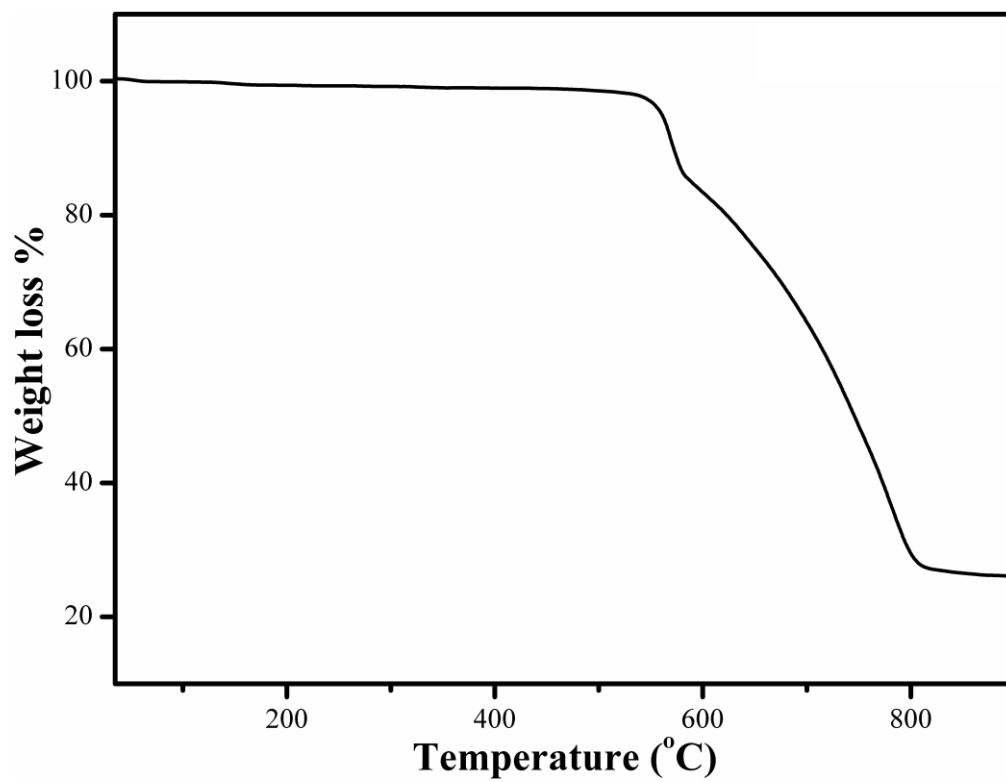

**Figure S11.** Thermogravimetric analysis curve of cyamelurate.

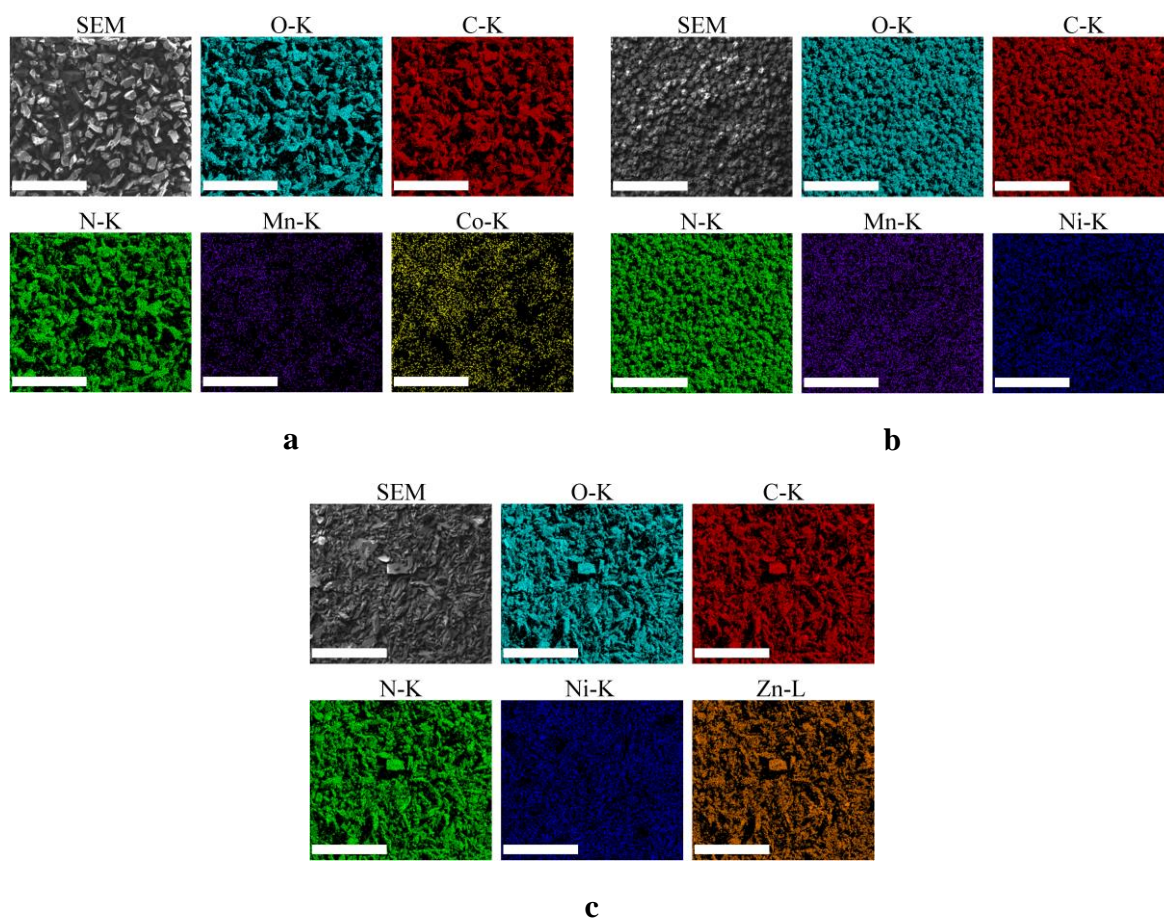

**Figure S12.** Energy Dispersive X-ray Diffraction analyses of MMOPs-(5-7). (a)-(c) EDS element-mapping images of MMOPs-(5-7) respectively, showing the distribution of carbon (red), nitrogen (green), oxygen (cyan) and metal ions (Mn in purple, Co in yellow, Ni in blue and Zn in orange) in the area of the crystalline samples (scale bar, 500 μm).

## In-situ Energy Dispersive Spectroscopy/Scanning Electron Microscopy

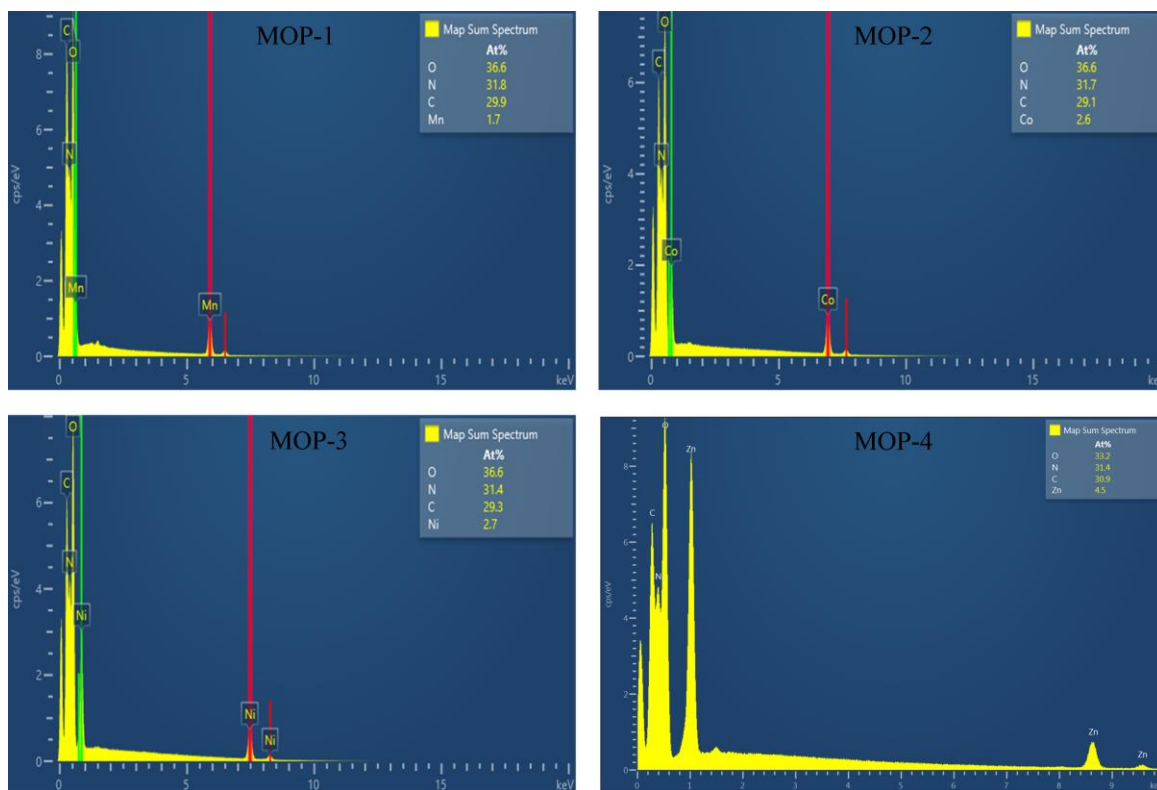

**Figure S13.** Energy Dispersive X-ray Diffraction plot analysis of MOPs-(1-4) representing the percentage of elements.



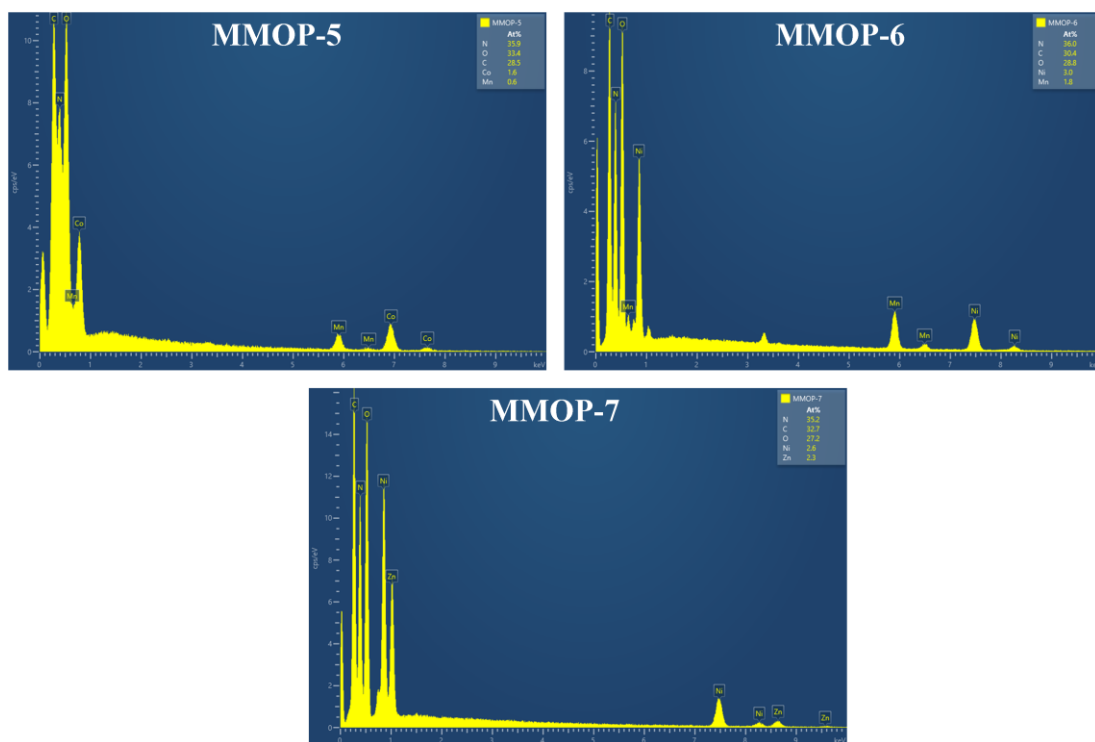

a

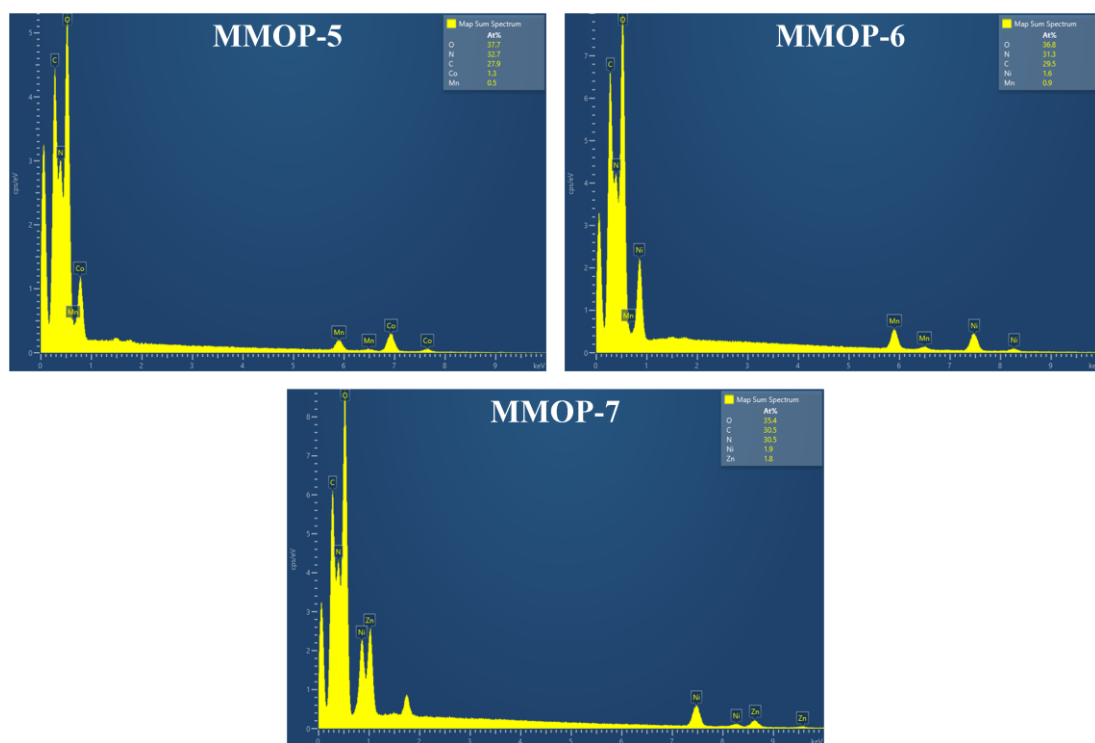

b

**Figure S14.** Energy Dispersive X-ray Diffraction plot analysis of MMOPs-(5-7) representing the percentage of elements. a) Point, b) Mapping analysis.

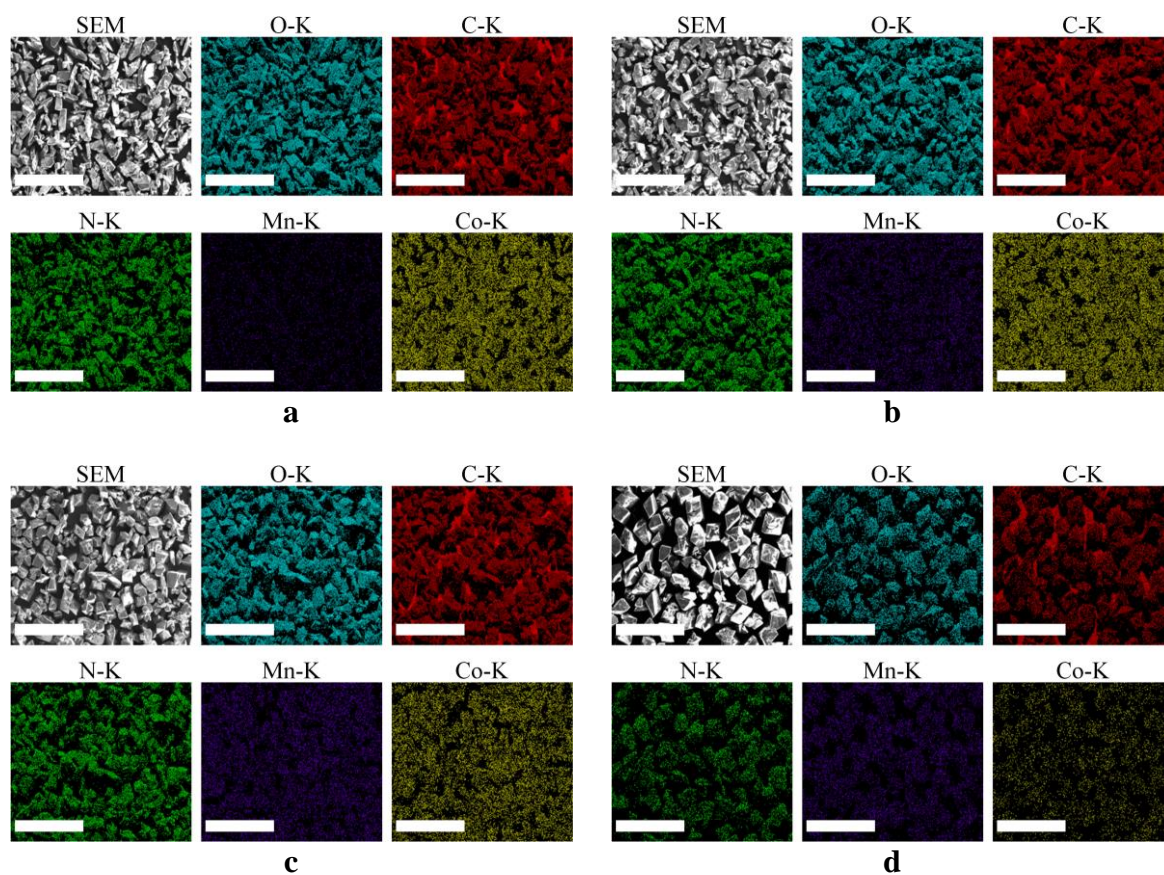

**Figure S15.** Energy Dispersive X-ray Diffraction mapping analysis of MMOP-5 metal ratios study. a) 20-80, b) 40-60, c) 60-40, d) 80-20 (Scale bar, 500  $\mu\text{m}$ ).

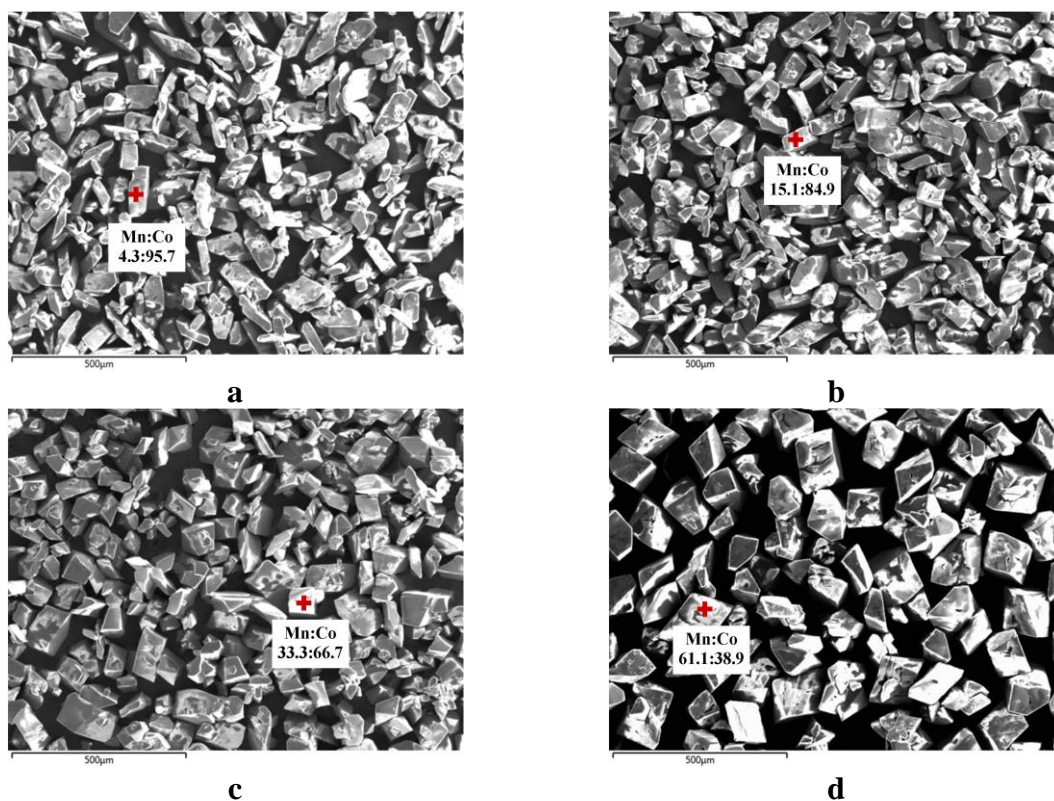

**Figure S16.** Energy Dispersive X-ray Diffraction point analysis of MMOP-5 metal ratios study. a) 20-80, b) 40-60, c) 60-40, d) 80-20.

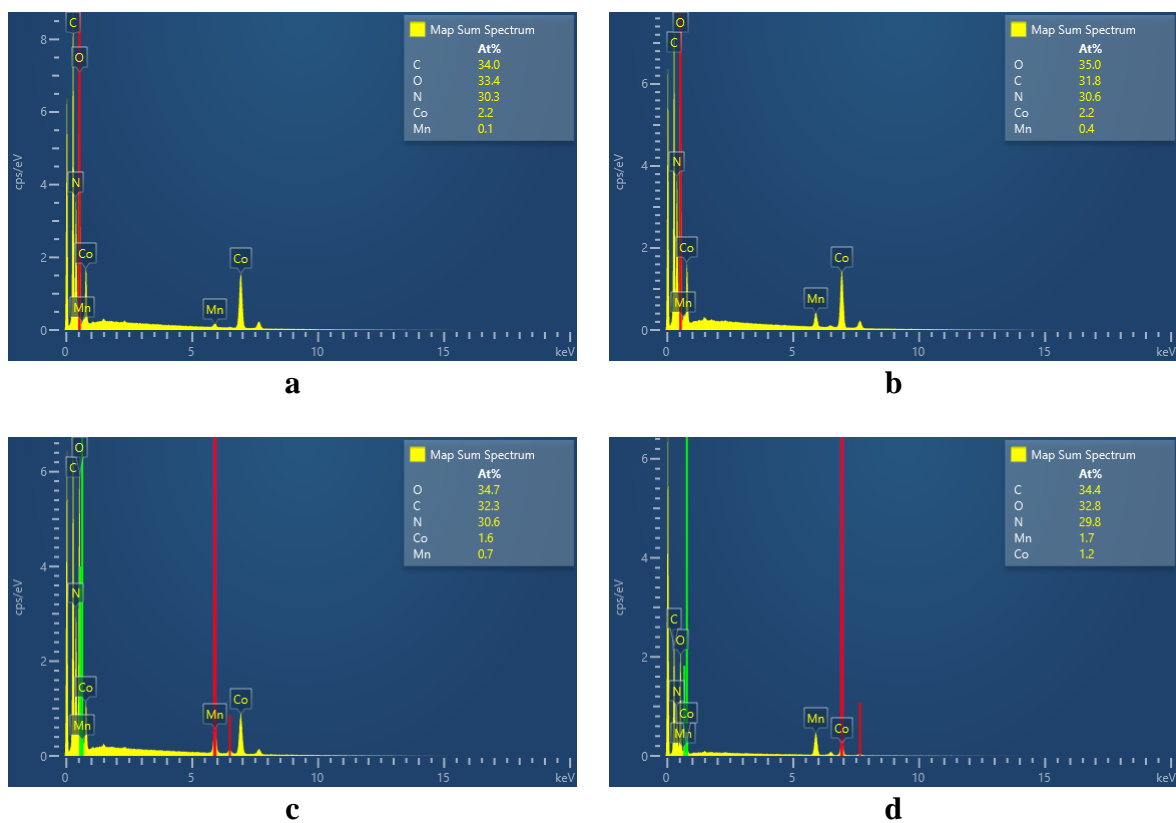

**Figure S17.** Energy Dispersive X-ray Diffraction plot of mapping analysis of MMOP-5 metal ratio study a) 20-80, b) 40-60, c) 60-40, d) 80-20.

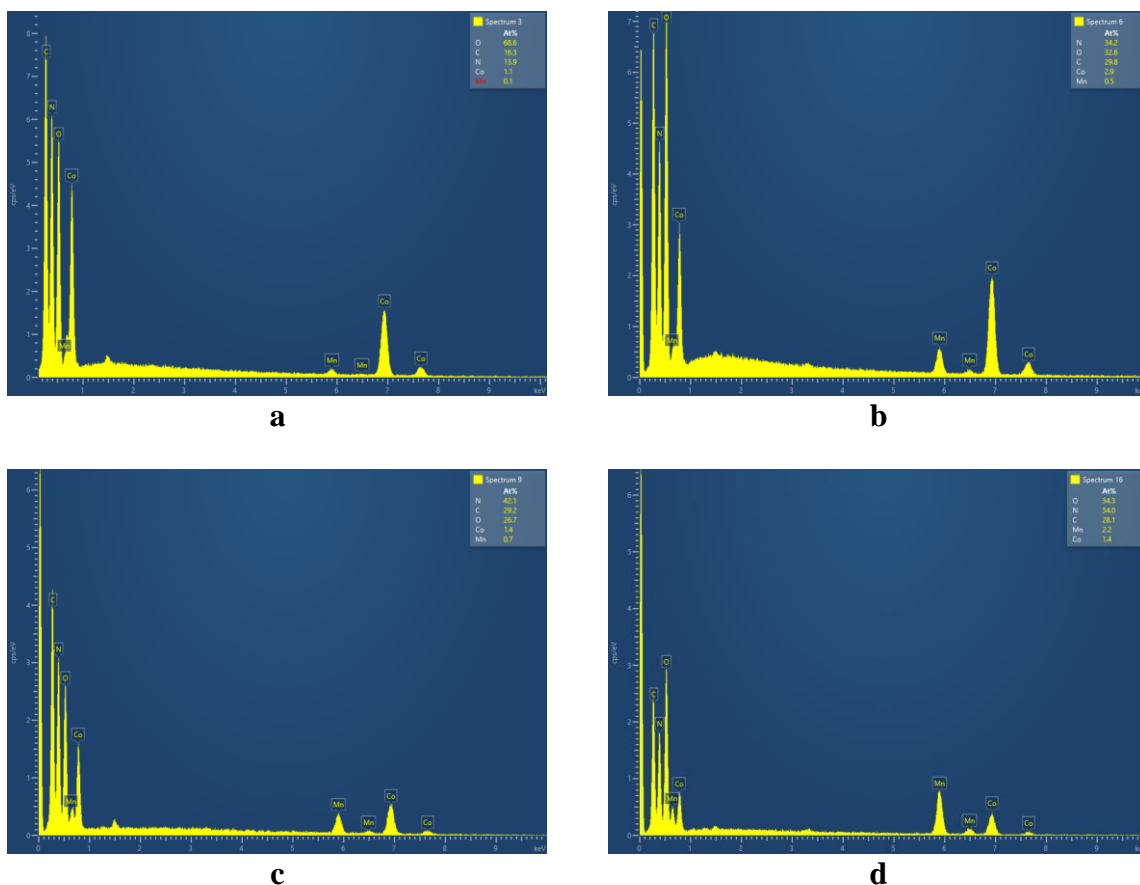

**Figure S18.** Energy Dispersive X-ray Diffraction plot of point analysis of MMOP-5 metal ratio study a) 20-80, b) 40-60, c) 60-40, d) 80-20.

**Table S12.** Summary of Energy Dispersive X-ray Diffraction analysis of MMOP-5 prepared with different metal ratios.

| Ratios | Ratios seen in EDS<br>(Mn:Co) |           |
|--------|-------------------------------|-----------|
|        | Mole %                        |           |
|        | Mapping                       | Point     |
| 20:80  | 4.3:95.7                      | 4.3:95.7  |
| 40:60  | 15.4:84.6                     | 15.1:84.9 |
| 50:50  | 28:72                         | 28:72     |
| 60:40  | 30.4:69.6                     | 33.3:66.7 |
| 80:20  | 58.6:41.4                     | 61.1:38.9 |

## X-ray photoelectron spectroscopy

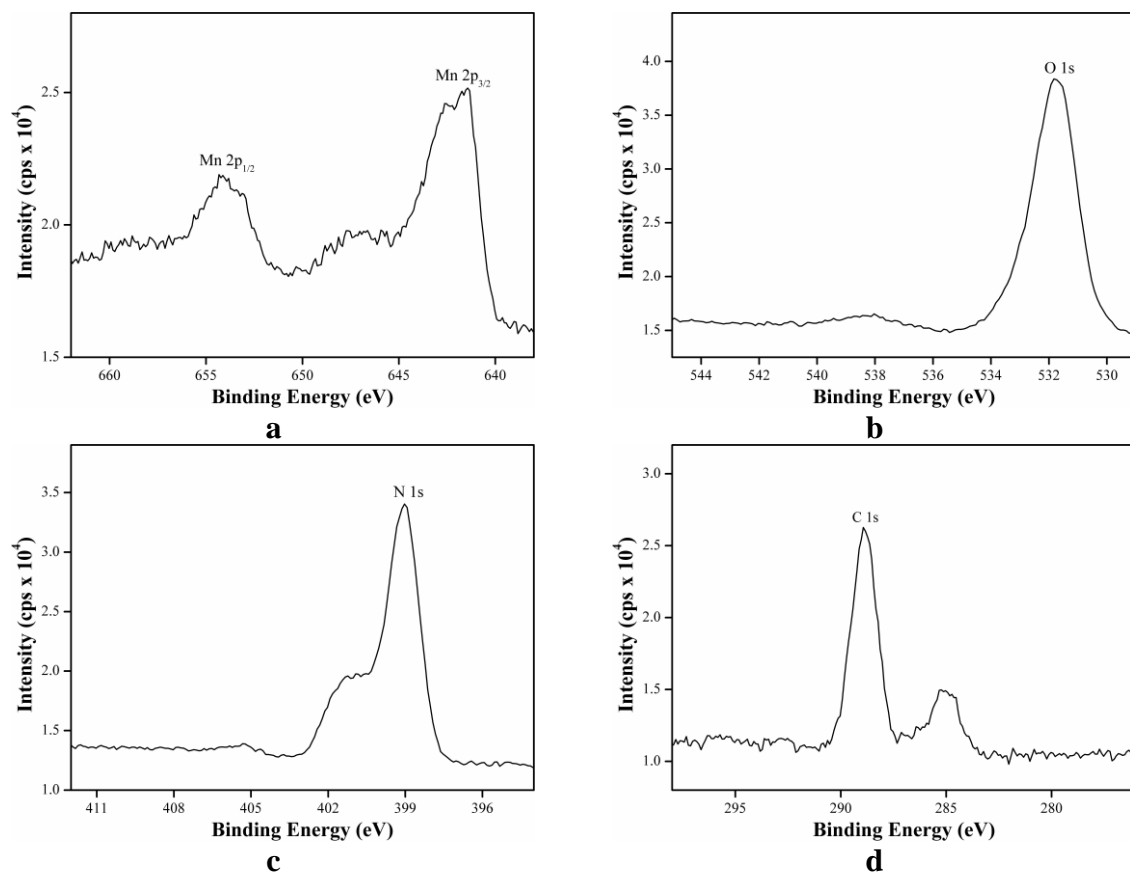

**Figure S19.** XPS patterns of MOP-1. a)-d) Narrow survey XPS in MOP-1 of Mn 2p<sub>3/2</sub> and 2p<sub>1/2</sub>; O 1s; N 1s; C 1s.

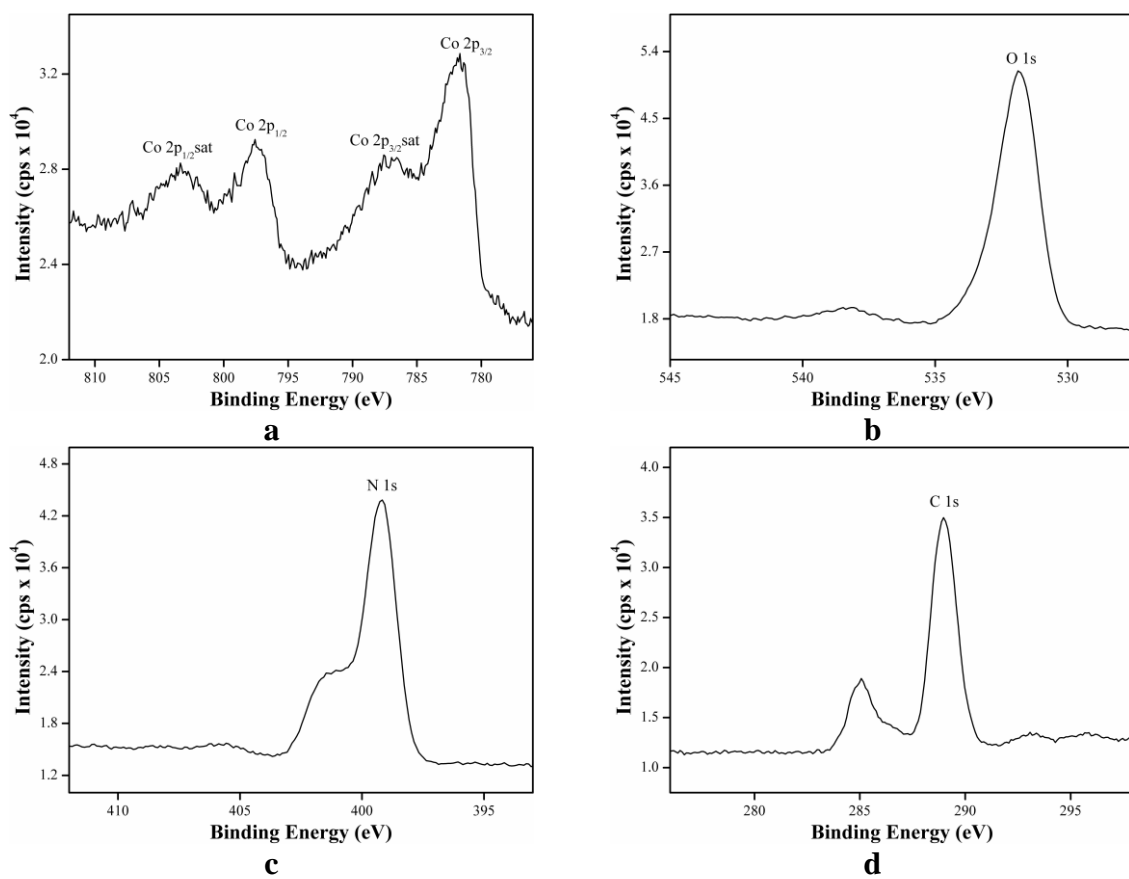

**Figure S20.** XPS patterns of MOP-2. a)-d) Narrow survey XPS in MOP-2 of Co 2p<sub>3/2</sub>, 2p<sub>3/2</sub>sat, 2p<sub>1/2</sub> and 2p<sub>1/2</sub>sat; O 1s; N 1s; C 1s.

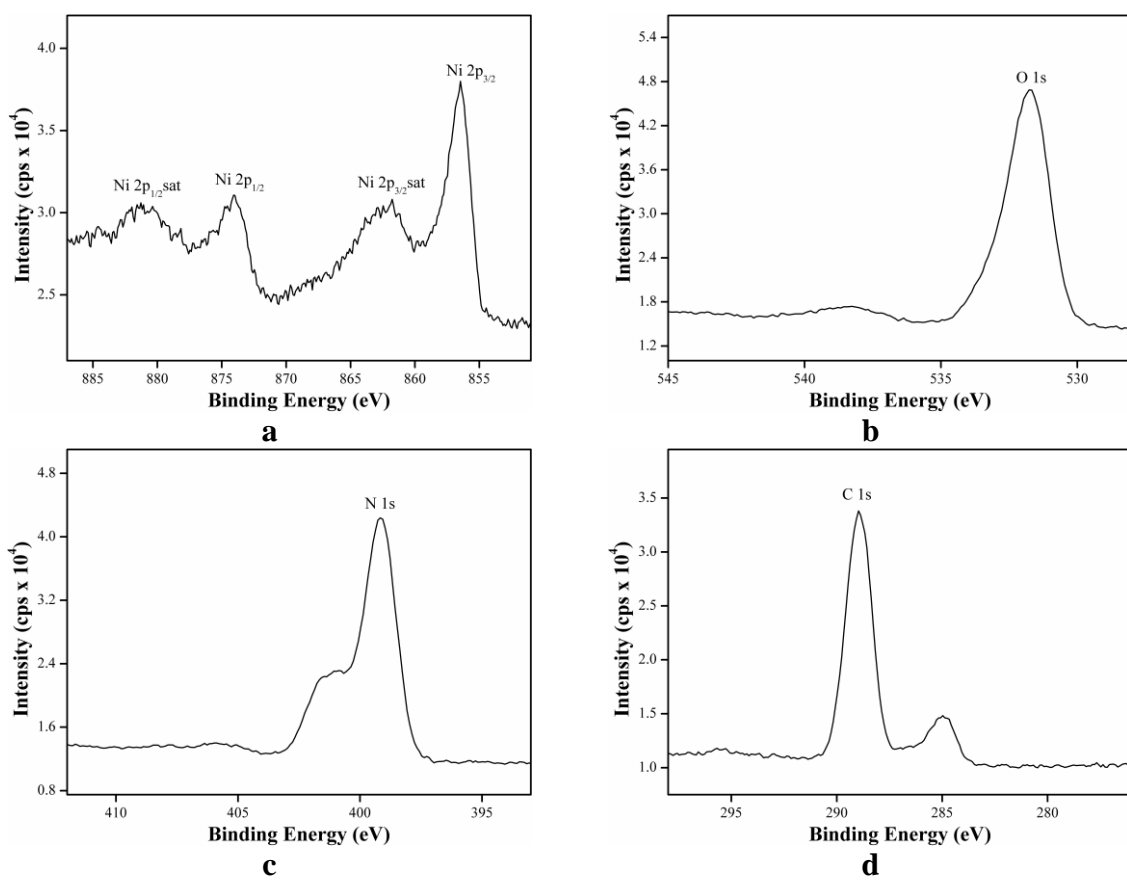

**Figure S21.** XPS patterns of MOP-3. a)-d) Narrow survey XPS in MOP-3 of Ni 2p<sub>3/2</sub>, 2p<sub>3/2</sub>sat, 2p<sub>1/2</sub> and 2p<sub>1/2</sub>sat; O 1s; N 1s; C 1s.

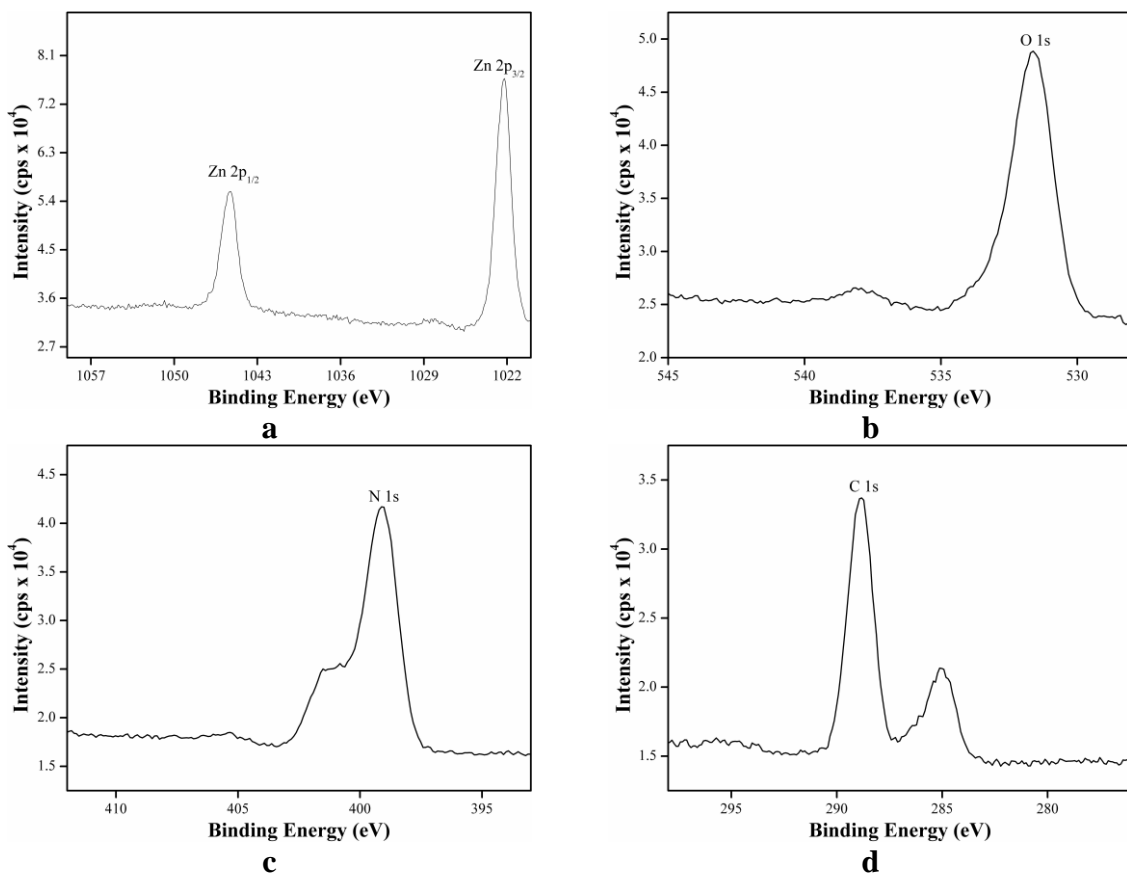

**Figure S22.** XPS patterns of MOP-4. a)-d) Narrow survey XPS in MOP-4 of Zn 2p<sub>3/2</sub> and 2p<sub>1/2</sub>; O 1s; N 1s; C 1s.



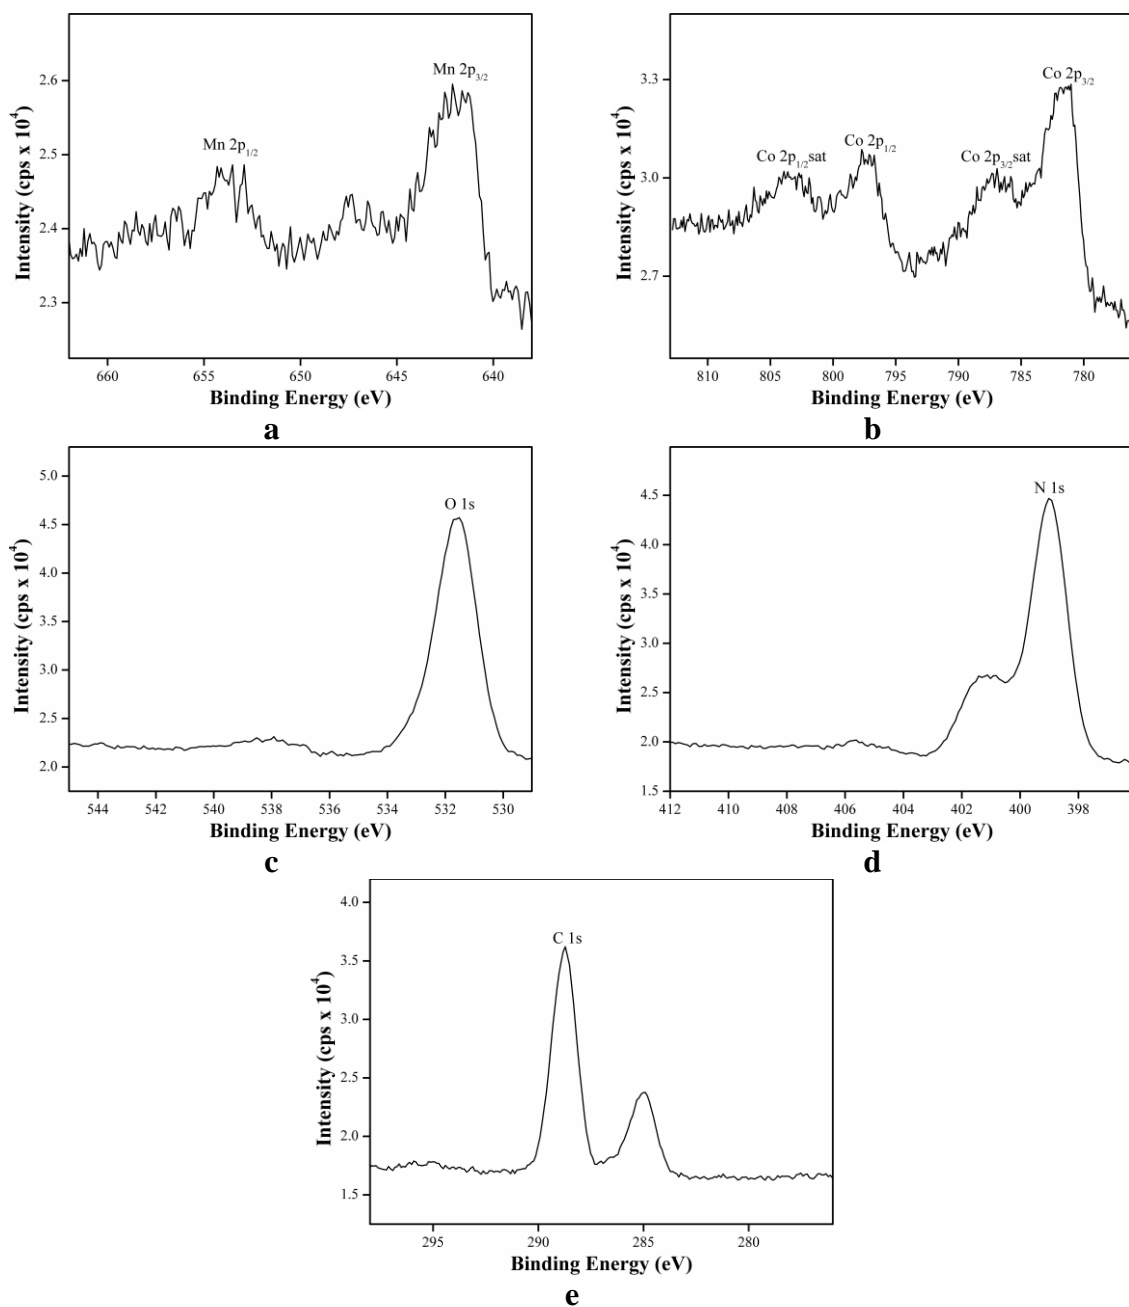

**Figure S23.** XPS patterns of MMOP-5. a)-e) Narrow survey XPS in MMOP-5 of Mn 2p<sub>3/2</sub> and 2p<sub>1/2</sub>; Co 2p<sub>3/2</sub>, 2p<sub>3/2</sub>sat, 2p<sub>1/2</sub> and 2p<sub>1/2</sub>sat; O 1s; N1s; C 1s.

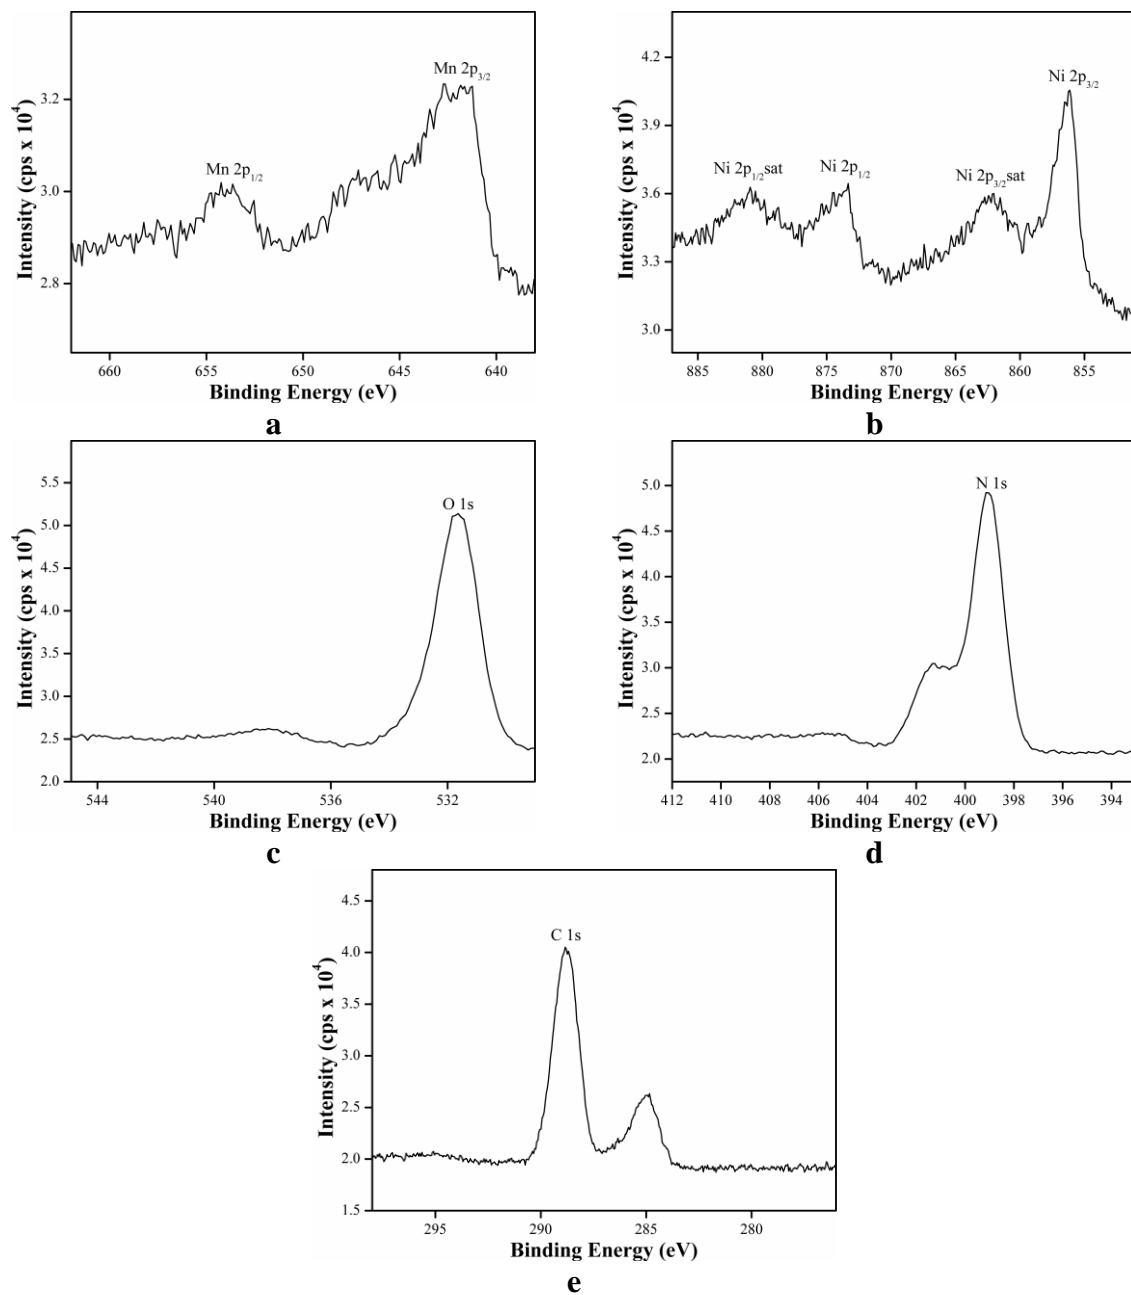

**Figure S24.** XPS patterns of MMOP-6. a)-e) Narrow survey XPS in MMOP-6 of Mn 2p<sub>3/2</sub> and 2p<sub>1/2</sub>; Ni 2p<sub>3/2</sub>, 2p<sub>3/2</sub>sat, 2p<sub>1/2</sub> and 2p<sub>1/2</sub>sat; O 1s; N1s; C 1s.

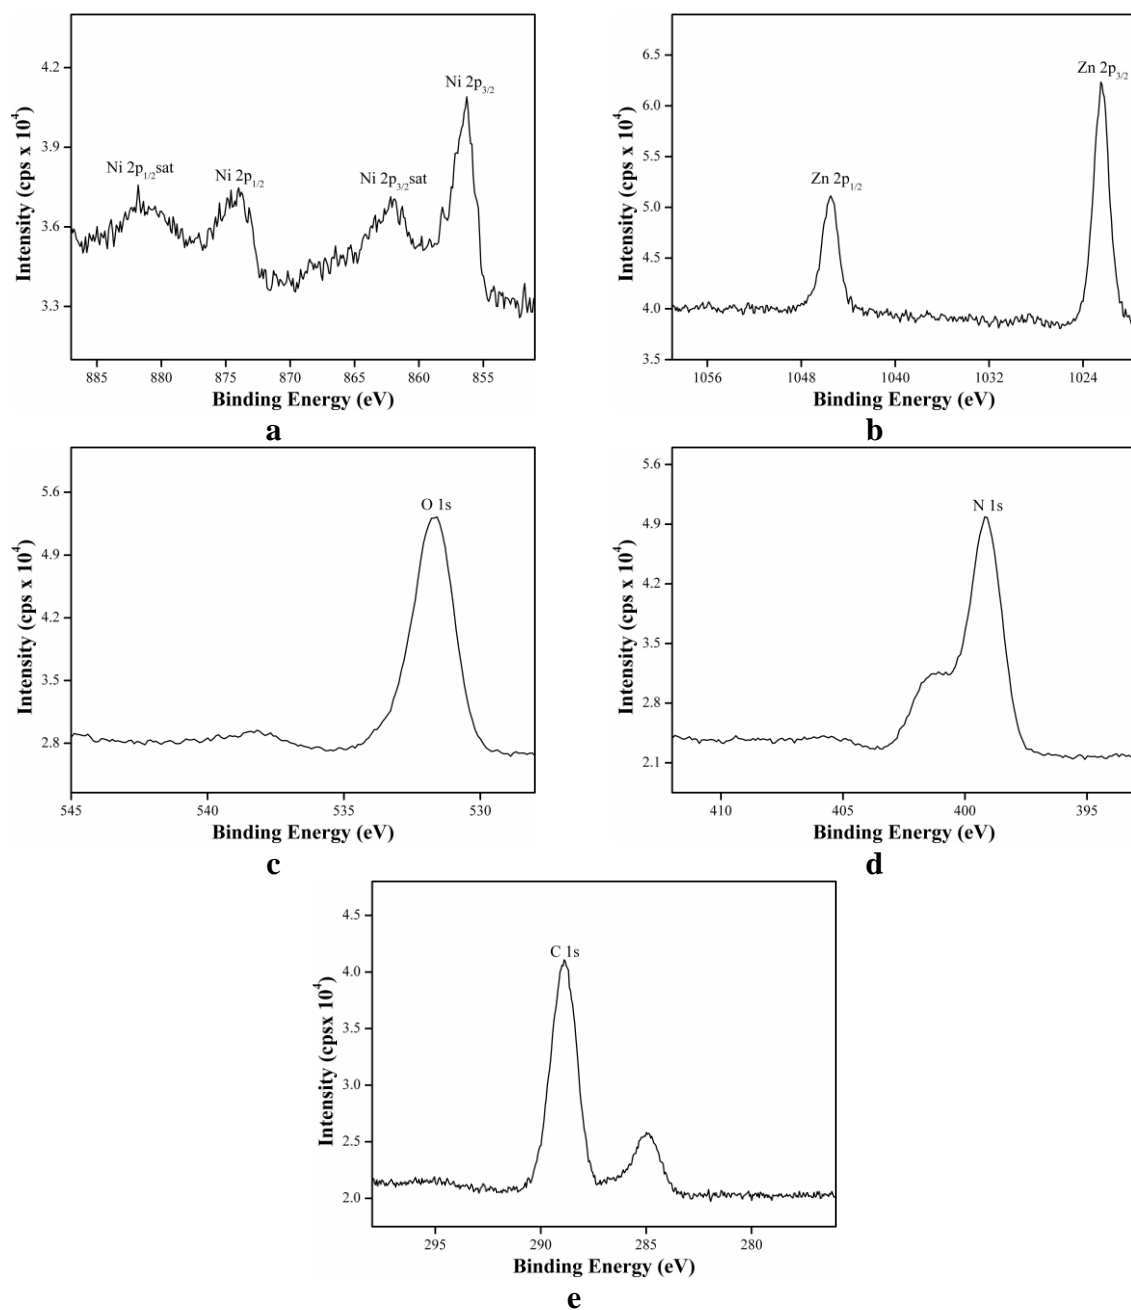

**Figure S25.** XPS patterns of MMOP-7. a)-e) Narrow survey XPS in MMOP-7 of Ni 2p<sub>3/2</sub>, 2p<sub>3/2</sub>sat, 2p<sub>1/2</sub> and 2p<sub>1/2</sub>sat; Zn 2p<sub>3/2</sub> and 2p<sub>1/2</sub>; O 1s; N1s; C 1s.

**Table S13.** Binding energy values (eV) of XPS elements peaks for MOPs-(1-4) and MMOPs-(5-7).

| Element<br>Sample | Mn                |                   | Co                   |                   |                      |                   | Ni                   |                   |                      | Zn                |                   | O                 | N   | C   |     |
|-------------------|-------------------|-------------------|----------------------|-------------------|----------------------|-------------------|----------------------|-------------------|----------------------|-------------------|-------------------|-------------------|-----|-----|-----|
|                   | 2p <sub>1/2</sub> | 2p <sub>3/2</sub> | 2p <sub>1/2sat</sub> | 2p <sub>1/2</sub> | 2p <sub>3/2sat</sub> | 2p <sub>3/2</sub> | 2p <sub>1/2sat</sub> | 2p <sub>1/2</sub> | 2p <sub>3/2sat</sub> | 2p <sub>3/2</sub> | 2p <sub>3/2</sub> | 2p <sub>1/2</sub> | 1s  | 1s  | 1s  |
| MOP-1             | 654               | 641               |                      | -                 |                      |                   |                      |                   | -                    |                   | -                 |                   | 531 | 399 | 288 |
| MOP-2             |                   |                   | 804                  | 797               | 786                  | 782               |                      |                   | -                    |                   | -                 |                   | 531 | 399 | 288 |
| MOP-3             |                   |                   |                      |                   |                      |                   | 881                  | 873               | 862                  | 856               |                   |                   | 531 | 399 | 288 |
| MOP-4             |                   |                   |                      |                   |                      |                   |                      |                   |                      |                   | 1022              | 1045              | 531 | 399 | 288 |
| MMOP-5            | 654               | 641               | 804                  | 797               | 786                  | 782               |                      |                   | -                    |                   |                   |                   | 531 | 399 | 288 |
| MMOP-6            | 654               | 641               |                      |                   |                      |                   | 881                  | 873               | 862                  | 856               |                   |                   | 531 | 399 | 288 |
| MMOP-7            |                   |                   |                      |                   |                      |                   | 881                  | 873               | 862                  | 856               | 1022              | 1045              | 531 | 399 | 288 |

## Studies of Chromic Behaviour and Structural Transformation

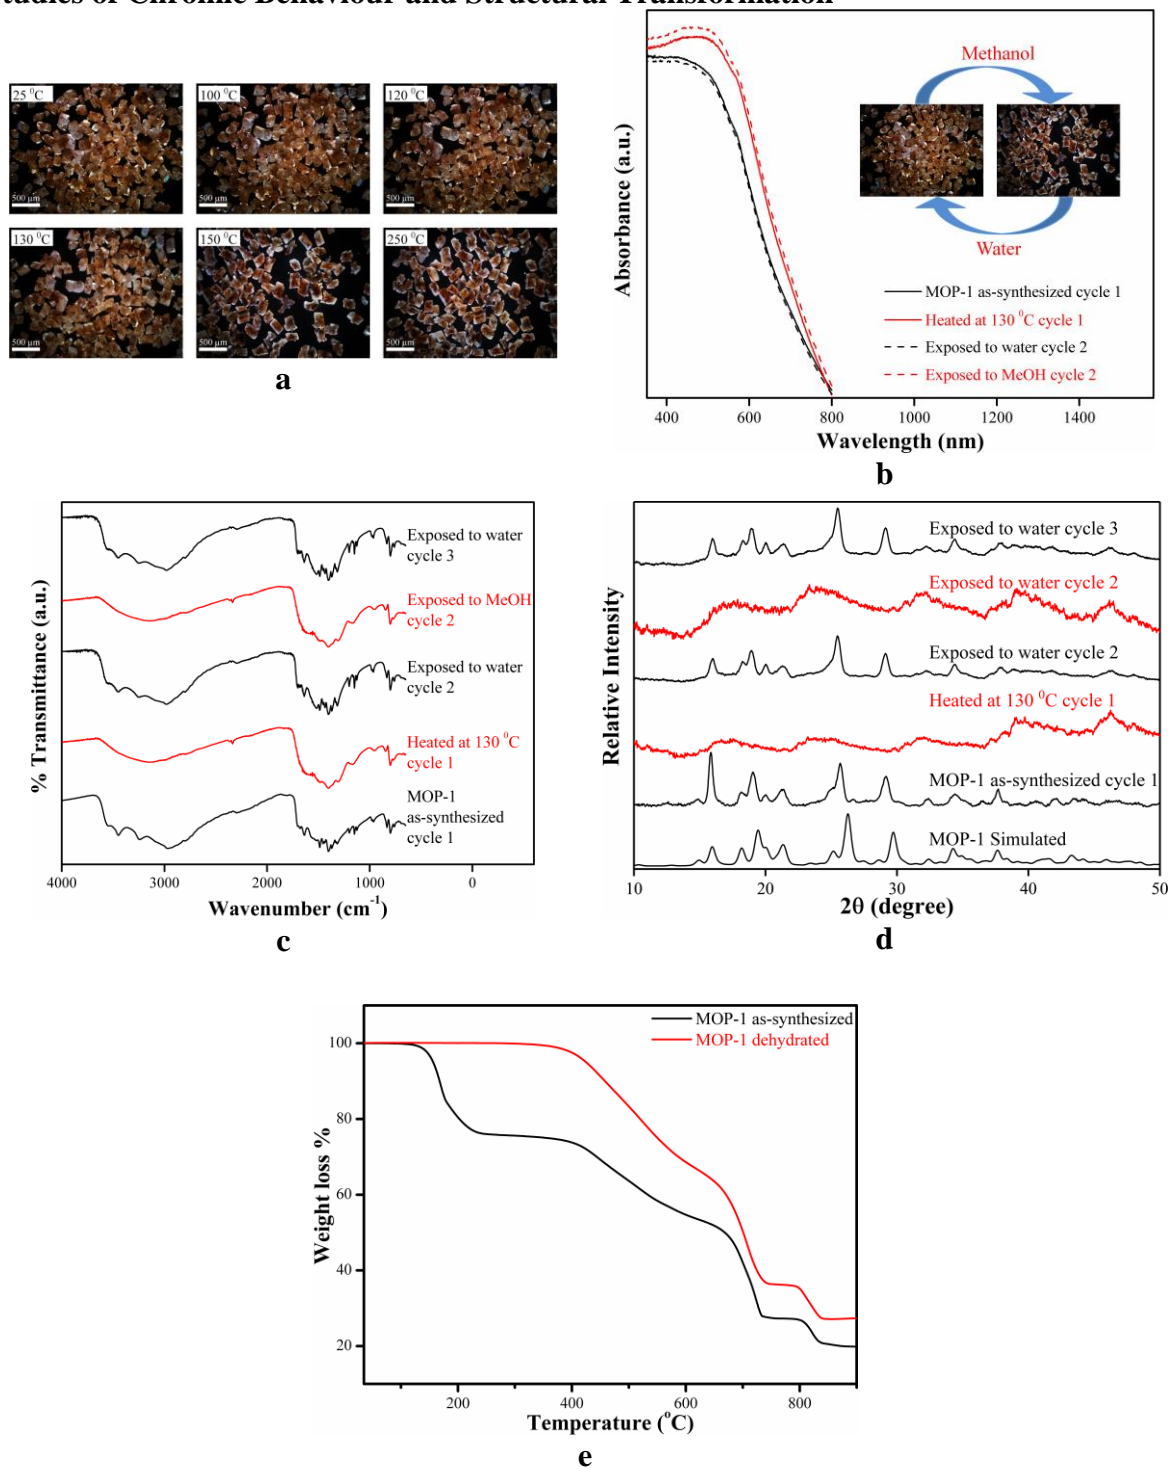

**Figure S26.** Chromic behaviour analysis of MOP-1 using a) *In-situ* thermal microscopy images at different temperatures from 25-250 °C (scale bar: 500  $\mu\text{m}$ ); b) UV-Vis spectra changes for MOP-1. Black solid lines: MOP-1 as synthesized; red solid lines: heated at 130 °C, black dash lines: sample on exposure in water and red dash lines: sample on exposure in methanol. Insert: chromism images of MOP-1; c) FTIR spectra of the MOP-1 as-synthesized, heated at 130 °C, exposed to water and then exposed to methanol d) PXRD patterns of the samples taken at different cycles and the simulated patterns calculated from the single-crystal X-ray diffraction data. e) TG curves of MOP-1 as synthesized and dehydrated. One cycle is referred to a process of dehydration followed by hydration.

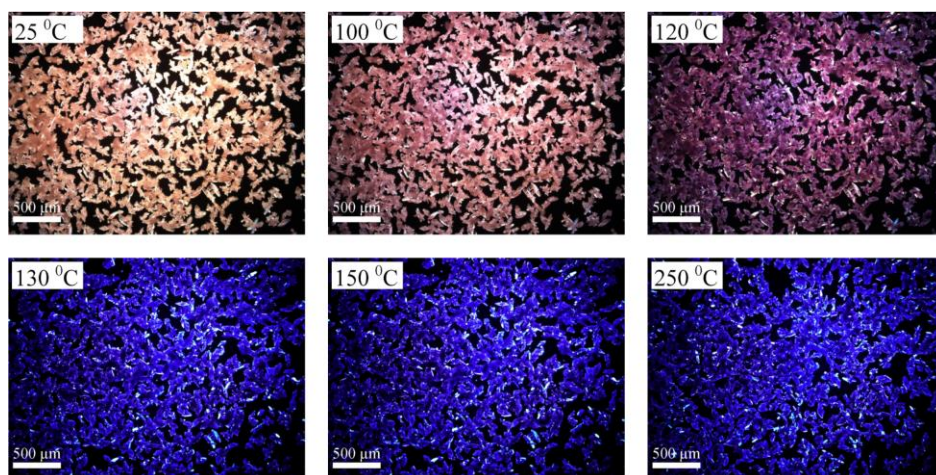

**Figure S27.** Chromic behaviour analysis of MOP-2 using *in-situ* thermal microscopy images at different temperatures from 25-250 °C (scale bar: 500 μm).

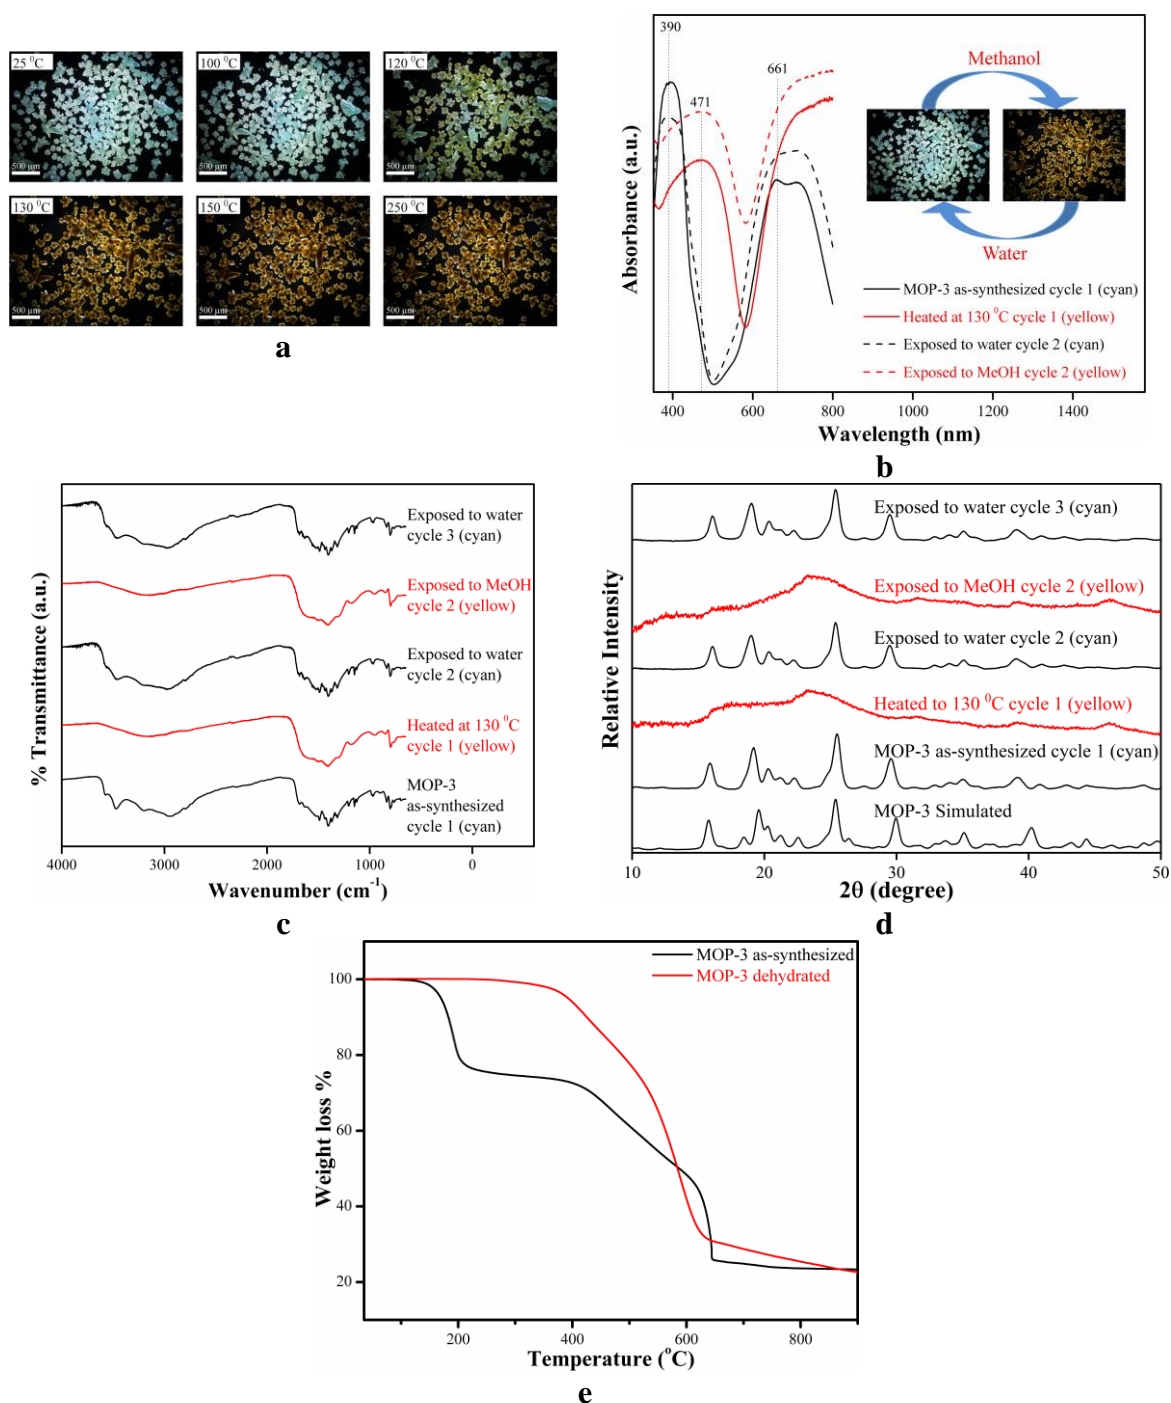

**Figure S28.** Chromic behaviour analysis of MOP-3 using. a) *In-situ* thermal microscopy images at different temperatures from 25-250 °C (scale bar: 500  $\mu\text{m}$ ); b) UV-Vis spectra changes for MOP-3. Black solid lines: MOP-3 as synthesized; red solid lines: heated at 130 °C, black dash lines: sample on exposure in water and red dash lines: sample on exposure in methanol. Insert: chromism images of MOP-3; c) FTIR spectra of the MOP-3 as-synthesized, heated at 130 °C, exposed to water and then exposed to methanol d) PXRD patterns of the samples taken at different cycles and the simulated patterns calculated from the single-crystal X-ray diffraction data. e) TG curves of MOP-3 as synthesized and dehydrated. One cycle is referred to a transformation that bring the cyan species to yellow species and return to the original colour.

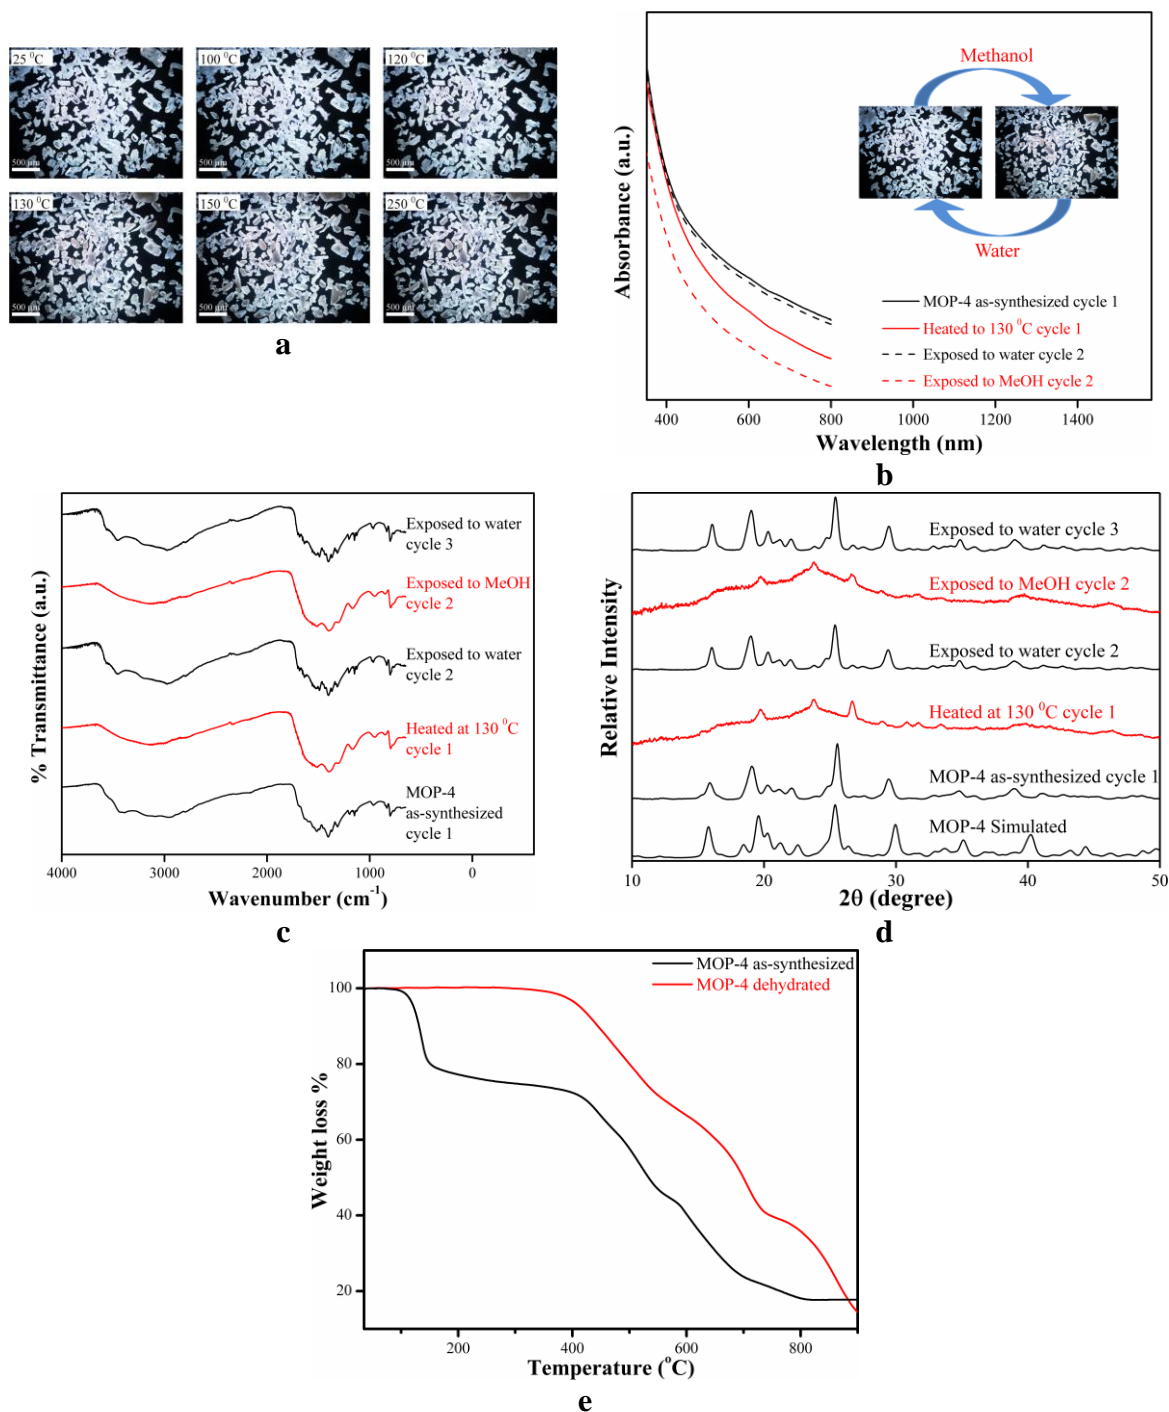

**Figure S29.** Chromic behaviour analysis of MOP-4 using. a) *In-situ* thermal microscopy images at different temperatures from 25-250 °C (scale bar: 500  $\mu\text{m}$ ); b) UV-Vis spectra changes for MOP-4. Black solid lines: MOP-4 as synthesized; red solid lines: heated at 130 °C, black dash lines: sample on exposure in water and red dash lines: sample on exposure in methanol. Insert: chromism images of MOP-4; c) FTIR spectra of the MOP-4 as-synthesized, heated at 130 °C, exposed to water and then exposed to methanol d) PXRD patterns of the samples taken at different cycles and the simulated patterns calculated from the single-crystal X-ray diffraction data. e) TG curves of MOP-4 as synthesized and dehydrated. One cycle is referred to a process of dehydration followed by hydration.



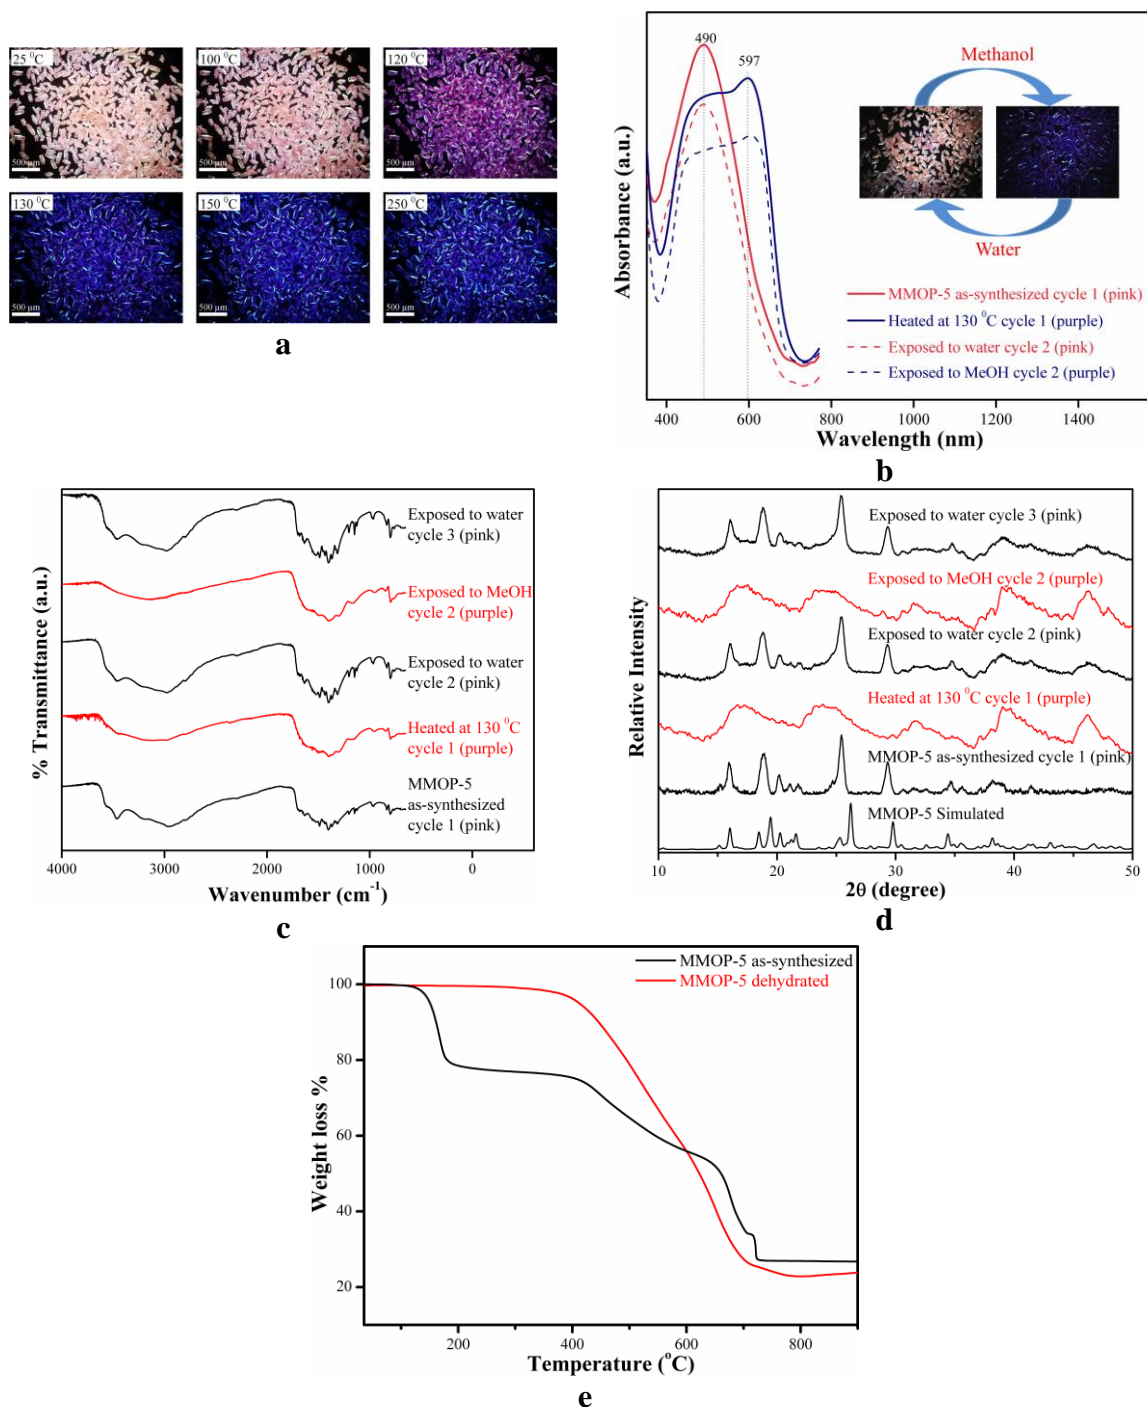

**Figure S30.** Chromic behaviour analysis of MMOP-5 using. a) *In-situ* thermal microscopy images at different temperatures from 25-250 °C (scale bar: 500  $\mu\text{m}$ ); b) UV-Vis spectra changes for MMOP-5. Pink solid lines: MMOP-5 as synthesized; purple solid lines: heated at 130 °C, pink dash lines: sample on exposure in water and purple dash lines: sample on exposure in methanol. Insert: chromism images of MMOP-5; c) FTIR spectra of the MMOP-5 as-synthesized, heated at 130 °C, exposed to water and then exposed to methanol d) PXRD patterns of the samples taken at different cycles and the simulated patterns calculated from the single-crystal X-ray diffraction data. e) TG curves of MMOP-5 as synthesized and dehydrated. One cycle is referred to a transformation that bring the pink species to purple species and return to the original colour.

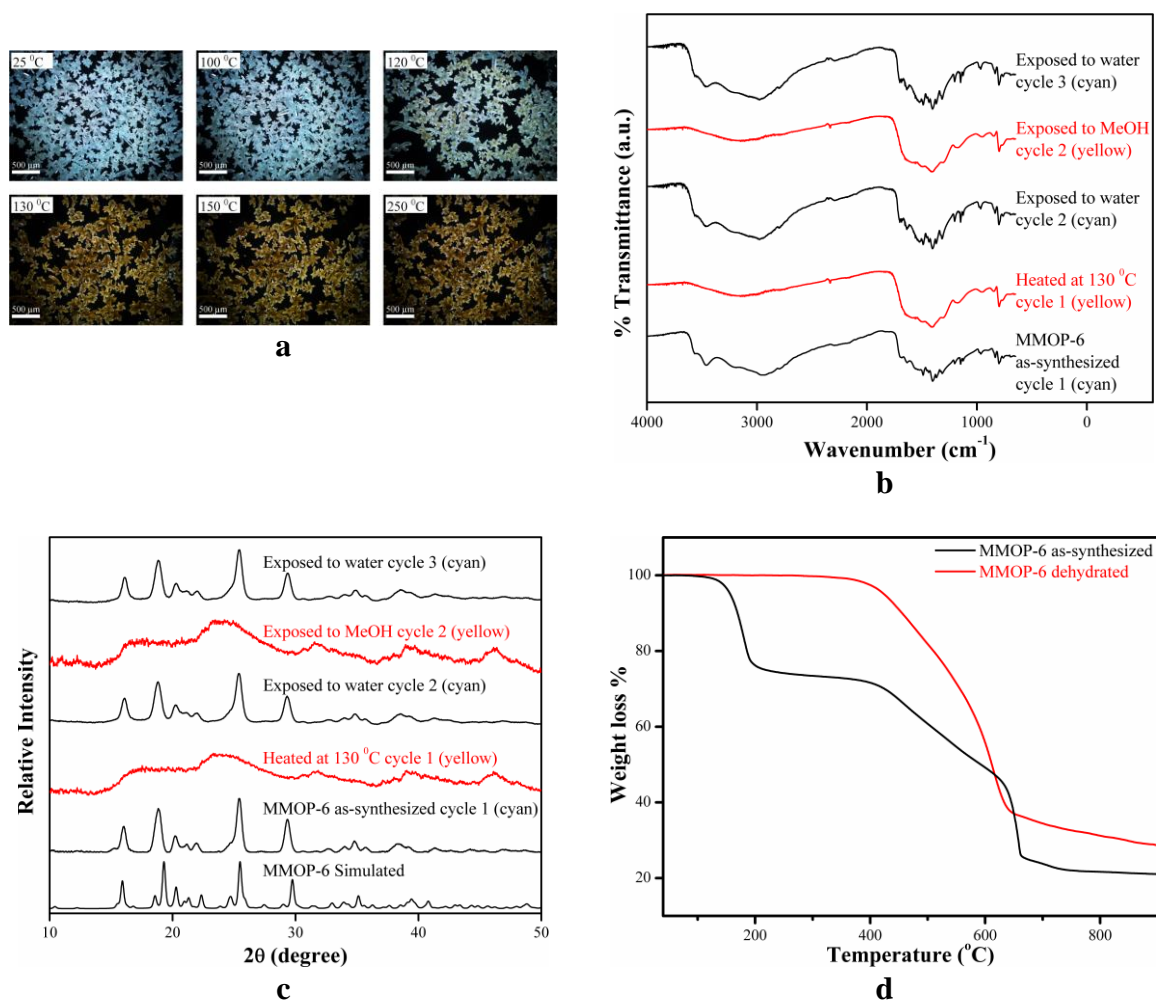

**Figure S31.** Chromic behaviour analysis of MMOP-6 using. a) *In-situ* thermal microscopy images at different temperatures from 25-250 °C (scale bar: 500 μm); b) FTIR spectra of the MMOP-6 as-synthesized, heated at 130 °C, exposed to water and then exposed to methanol c) PXRD patterns of the samples taken at different cycles and the simulated patterns calculated from the single-crystal X-ray diffraction data. d) TG curves of MMOP-6 as synthesized and dehydrated. One cycle is referred to a transformation that bring the cyan species to yellow species and return to the original colour.

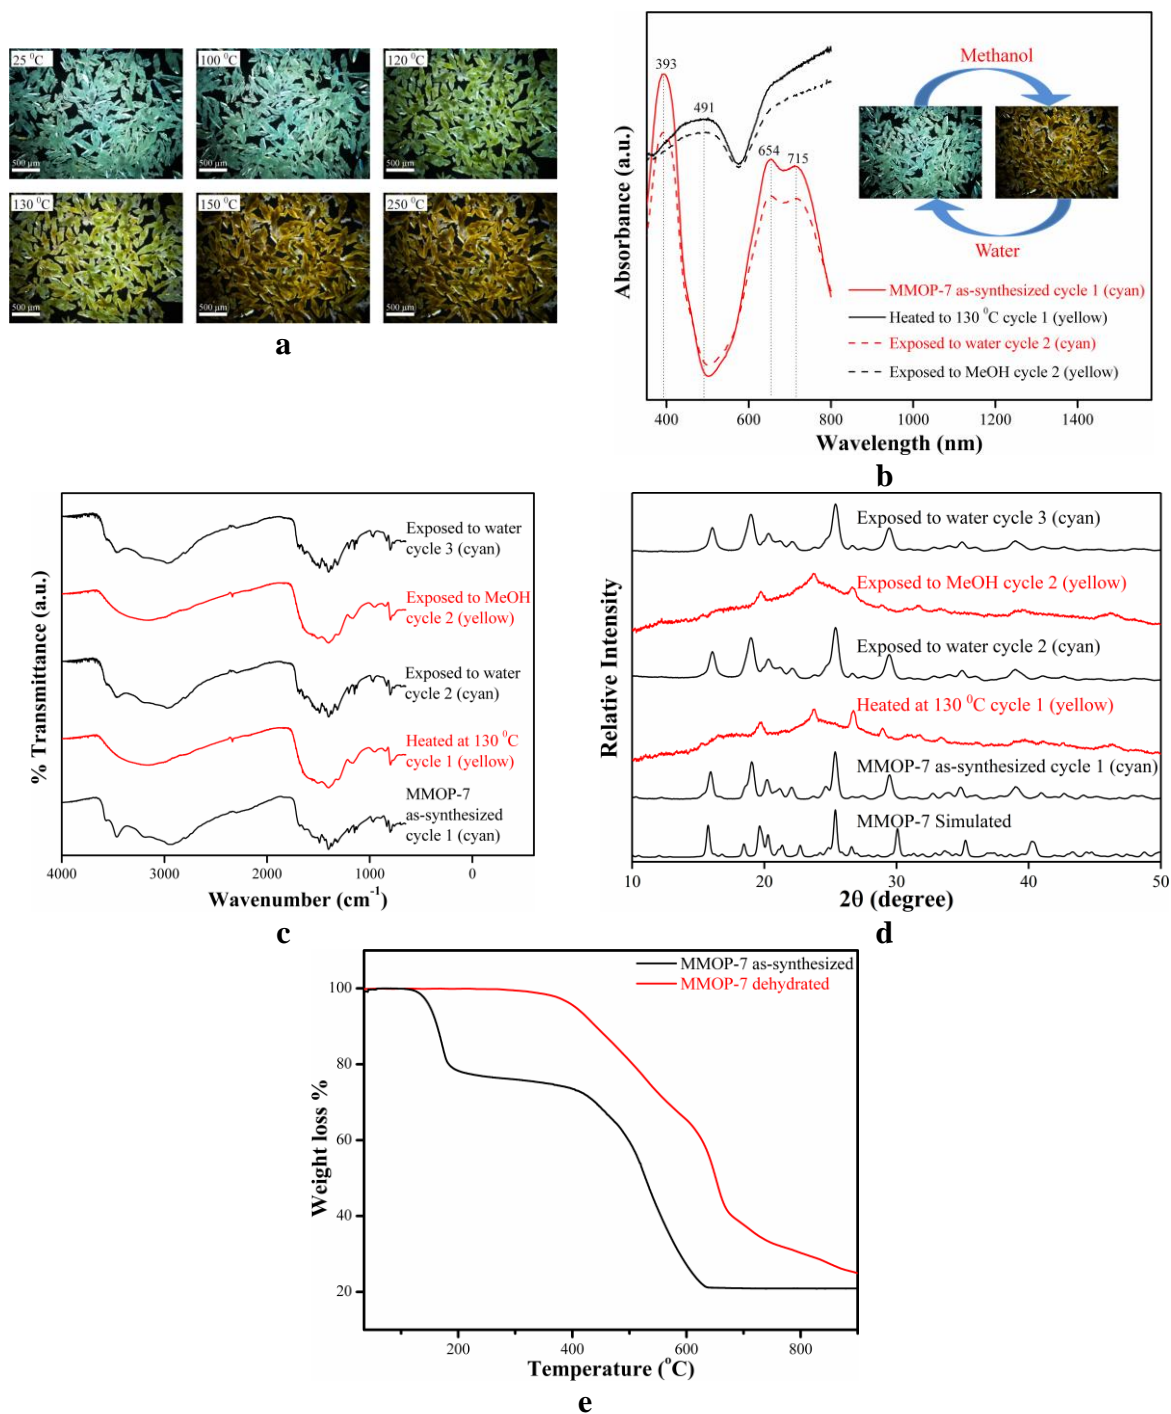

**Figure S32.** Chromic behaviour analysis of MMOP-7 using. a) *In-situ* thermal microscopy images at different temperatures from 25-250 °C (scale bar: 500 μm); b) UV-Vis spectra changes for MMOP-7. Black solid lines: MMOP-7 as synthesized; purple solid lines: heated at 130 °C, black dash lines: sample on exposure in water and red dash lines: sample on exposure in methanol. Insert: chromism images of MMOP-7; c) FTIR spectra of the MMOP-7 as-synthesized, heated at 130 °C, exposed to water and then exposed to methanol d) PXRD patterns of the samples taken at different cycles and the simulated patterns calculated from the single-crystal X-ray diffraction data. e) TG curves of MMOP-7 as synthesized and dehydrated. One cycle is referred to a transformation that bring the cyan species to yellow species and return to the original colour.
